# Supplementary material
Source: PubMed Central journal article supplement (PMC6538355)
Supplement: jciinsight-4-123987-s052.pdf [file jciinsight-4-123987-s052.pdf]

Supplemental Material for

## **High-throughput screening discovers anti-fibrotic properties of Haloperidol by hindering myofibroblast activation**

Michael Rehman<sup>1</sup>, Simone Vodret<sup>1</sup>, Luca Braga<sup>2</sup>, Corrado Guarnaccia<sup>3</sup>, Fulvio Celsi<sup>4</sup>, Giulia Rossetti<sup>5</sup>, Valentina Martinelli<sup>2</sup>, Tiziana Battini<sup>1</sup>, Carlin Long<sup>2</sup>, Kristina Vukusic<sup>1</sup>, Tea Kocijan<sup>1</sup>, Chiara Collesi<sup>2,6</sup>, Nadja Ring<sup>1</sup>, Natasa Skoko<sup>3</sup>, Mauro Giacca<sup>2,6</sup>, Giannino Del Sal<sup>7,8</sup>, Marco Confalonieri<sup>6</sup>, Marcello Raspa<sup>9</sup>, Alessandro Marcello<sup>10</sup>, Michael P. Myers<sup>11</sup>, Sergio Crovella<sup>3</sup>, Paolo Carloni<sup>5</sup>, Serena Zacchigna<sup>1,6</sup>

<sup>1</sup>Cardiovascular Biology, <sup>2</sup>Molecular Medicine, <sup>3</sup>Biotechnology Development, <sup>10</sup>Molecular Virology, and <sup>11</sup>Protein Networks Laboratories, International Centre for Genetic Engineering and Biotechnology (ICGEB), Padriciano, 34149, Trieste, Italy

<sup>4</sup>Institute for Maternal and Child Health, IRCCS "Burlo Garofolo", Trieste, Italy

<sup>5</sup>Computational Biomedicine Section, Institute of Advanced Simulation IAS-5 and Institute of Neuroscience and Medicine INM-9, Forschungszentrum Jülich GmbH, 52425, Jülich, Germany

<sup>6</sup>Department of Medical, Surgical and Health Sciences, University of Trieste, 34149 Trieste, Italy

<sup>7</sup>National Laboratory CIB, Area Science Park Padriciano, Trieste, 34149, Italy

<sup>8</sup>Department of Life Sciences, University of Trieste, Trieste, 34127, Italy

<sup>9</sup>Consiglio Nazionale delle Ricerche (IBCN), CNR-Campus International Development (EMMA-INFRAFRONTIER-IMPC), Rome, Italy

**This PDF file includes:**

**Supplementary Methods**

**Supplementary References**

**Supplementary Figures with legends 1 – 18**

**Supplementary Tables with legends 1 – 5**

**Supplementary Movie legends 1, 2**

## Supplementary Methods

### Cell culture

Primary murine fibroblasts were isolated from skin, lung, kidney and hearts of adult CD1, C57BL/6 or  $\alpha$ SMA-RFP/COLL-EGFP mice (1) by mechanical and enzymatic tissue digestion. Briefly, tissue was chopped in small chunks that were digested using a mixture of enzymes (Miltenyi Biotec, 130-098-305) for 1 hour at 37°C with mechanical dissociation followed by filtration through a 70  $\mu$ m cell strainer and centrifugation. Fibroblasts were seeded on culture plates, changing the medium after 2 hours and never kept in culture for more than 3 passages. Primary human dermal fibroblasts and NIH3T3 were obtained from Lonza and ATCC, respectively. The lung adenocarcinoma cell line LG1233 was derived from lung tumors of C57BL/6 KP mice (K-rasLSL-G12D/+;p53fl/fl mice) and was kindly provided by Dr. Tyler Jacks (Massachusetts Institute of Technology, Cambridge, MA) (2). All cells were maintained in Dulbecco's Modified Eagle's Medium (DMEM), supplemented with 10% FBS. Myofibroblast differentiation was induced by TGF $\beta$  (25 ng/mL, Peprotech Inc, Cat. No. 100 35-B). Haloperidol (Haldol) was purchased from Janssen Pharmaceuticals, Nintedanib (Ofev) was purchased from Boehringer Ingelheim, and Pirfenidone (Esbriet) was purchased from Roche. The IC<sub>50</sub> values of all three drugs were analyzed to determine the concentration to treat fibroblasts. Nintedanib and Pirfenidone were used at 1  $\mu$ M and 200  $\mu$ M respectively.

### High-throughput screening

Primary murine adult cardiac fibroblasts were plated in 384 well (PerkinElmer ViewPlate-384 Black, Optically Clear Bottom, Tissue Culture Treated) using a Multidrop™ Combi Reagent Dispenser (Thermo Fisher Scientific), in order to obtain homogeneous seeding of the cells. The next day, an intermediate dilution (50  $\mu$ M; 0.5% DMSO in DMEM) of the FDA-approved compound library (640 compounds, ENZO Life Sciences) was prepared using the STARlet automated liquid handling station (Hamilton) and 10  $\mu$ l of this dilution was spotted on top of the cells, thus reaching a final concentration of 10  $\mu$ M with 0.1% DMSO. After additional 48 hours, the cells were fixed in 4% paraformaldehyde (PFA) for 10 minutes, washed in Phosphate Buffer Saline (PBS) and stained with both Hoechst 33342 (Thermo Fisher Scientific) and HCS Cell Mask Deep Red staining (Thermo Fisher Scientific). Image acquisition was performed using the ImageXpress Micro high content screening microscope (Molecular Devices) with a Nikon PlanFluor 10 x (NA=0.30) objective. A total of 4 fields per well were acquired and subsequently analysed for  $\alpha$ SMA expression (TRITC channel, cellular mean fluorescence intensity) using the MetaXpress software (Molecular Devices) running the multi-wavelength cell scoring application module. The nuclear region was defined by an algorithm that segments the Hoechst 33342 channel signal using a combination of morphological parameters and pixel intensity over background. Cell viability was assessed by counting nuclei number. Upon assessment of normal distribution (Kolmogorov-Smirnov test), compounds exerting a toxic effect (z-score  $P \leq 0.10$ ) were excluded from further

analysis. The average size of each cell was assessed by HCS Cell Mask Deep Red staining and the so defined region was interrogated for pixel intensity in the TRITC channel to estimate the average  $\alpha$ SMA expression per cell.

### Gene silencing

Silencing of Sigmar1 was performed in primary fibroblasts and NIH3T3, using the following shRNAs: TRCN0000193914 (shSigmar1\_1), TRCN0000194512 (shSigmar1\_2), TRCN0000292956 (shSigmar1\_3), TRCN0000292958 (shSigmar1\_4) obtained from Sigma Aldrich. Lentiviral particles expressing shRNAs were produced in 293T cells and used to transduce fibroblasts. Puromycin selection was initiated after 48 hours and continued for more than 3 days. Silencing of PERK was performed in primary fibroblasts with siPERK from SCBT (sc-36214) as per company instructions using transfection reagent Lipofectamine RNAiMax (ThermoFischer). siUBC, obtained from Dharmacon, was used to determine transfection efficiency.

### Immunoblotting and quantification

Protein lysates were prepared in lysis buffer containing 1% Triton X-100, 100mM Tris (pH 8.0), 100mM NaCl, 10mM EDTA, and run on Bis-Tris based polyacrylamide gels. Blocking of nitrocellulose membranes was done with 5% non-fat dry milk or 5% BSA. Densitometric analysis of bands was performed using ImageJ software. Integrated density of the area of the band and a similar size area from the background was measured. After background subtraction, normalization was done by dividing by the integrated density of the loading control followed by fold change compared to control condition.

### Quantitative real time PCR

For quantitative real time PCR, RNA was extracted and purified by Trizol (Invitrogen) according to manufacturer's instructions, followed by cDNA synthesis using the M-MLV RT Kit from Invitrogen. Quantitative PCR was performed on a BioRad machine in a total volume of 10 $\mu$ l with 250nM primers and using *Gapdh* as a housekeeping gene. The sequences of the primers are provided in the Supplementary Table 5.

### Calcium imaging

The fluorescent calcium indicator Fluo4/AM (Invitrogen) was used to estimate cytosolic calcium levels by either live imaging or using a plate reader. For live imaging, cells were washed with HBSS and loaded with 5 $\mu$ M Fluo4 in HBSS for 30 minutes at 37°C. Cells were imaged using a 40X oil-immersion objective at 100ms frame rate and a scanning confocal microscope (LSM 880 Carl Zeiss). The 488nm line of Argon laser was used to excite the fluorophore and images were collected at 520nm emission. Haloperidol was added during live imaging, approximately after 10 seconds (necessary to obtain a stable baseline). For microplate reader experiments, cells were plated in 96-wells plate and stained with Fluo4 as for confocal imaging. Subsequently they were placed in a multimode plate reader (Envision multilabel plate reader, PerkinElmer) equipped with

liquid handling for addition of appropriate drugs during the course of the experiments. Fluorescence was excited at 488nm and data collected at 520nm, every second. In both cases, data were analyzed using the F/F<sub>0</sub> method, in which F represents the fluorescence at any time point, while F<sub>0</sub> is the mean baseline fluorescence, averaged between either the first 10 frames for confocal imaging or the first 5 frames for multi-plate imaging.

### Proliferation assays

Proliferation was assessed using 3-(4,5-dimethylthiazol-2-yl)-2,5-diphenyltetrazolium bromide (MTT) assay (Sigma-Aldrich) or crystal violet (Sigma-Aldrich) cell staining. Briefly, cells were washed once with PBS followed by incubation in media containing the MTT reagent for approximately 30 minutes. Cells with precipitated MTT were solubilized in 1% SDS and the optical signal read at 570 nm. For crystal violet staining, adherent cells were stained with 0.5% crystal violet solution in 25% methanol, washed and solubilized in 1% SDS. Optical absorbance was measured at 590 nm.

### Migration assays

Migration was measured in a wound healing scratch assay. Fibroblasts were plated in 24 well plate with appropriate factors in 2% FBS DMEM media and let grow for 72 hours. After the monolayer formation, three scratches were made in the monolayer with p200 tip and the wound closure was monitored for 24 hours. Cells were fixed and stained with crystal violet and imaged for comparison of wound closure.

### Luciferase reporter assays

The CAGA-Luc reporter was a gift from Dr. F. Loffredo, (ICGEB, Trieste, Italy) and was used as previously reported (3). Firefly Luciferase Assay Kit (Biotium, Cat: 30075-1) was used for all assays. Briefly, 100,000 cells were plated in 24-well plates. The next day, cells were transfected with a CAGA-Luc reporter plasmid (2 µg) and GFP (1 µg) reporter plasmids using Lipofectamine 2000 (Invitrogen). The next day, the medium was changed with fresh medium containing TGFβ, Haloperidol and their combination. Cells were harvested after 48 hours in 100 µl of lysis buffer and luciferase activity determined by Envision plate reader (Perkin Elmer).

### Collagen gel contraction assay

Collagen gel was prepared from homemade rat tail collagen. Prior to preparing collagen gel, fibroblasts were detached by trypsin/EDTA solution and resuspended in DMEM media. 300 µl of collagen gel with cells was prepared by mixing in the order of 50 µl of 8% NaHCO<sub>3</sub>, 100 µl of 200,000 cell suspension, 150 µl of collagen solution and the contents were quickly transferred to 37° incubator for 1 hour for gel polymerization. Later 500 µl of media containing factors was added and gels were analyzed in the next days.

## Docking studies

Haloperidol was structurally preprocessed using LigPrep from the Schrodinger Suite (4). Three different Haloperidol configurations were identified, considering pH values of 7.0 with a tolerance of +/- 2.0 unit of pH, as recommended by the Epik algorithm. Such penalty is considered in the final Docking Score, improving its ability of separating active compounds from inactive compounds. If this tolerance is omitted, i.e. if pH is set to 7.0 +/- 0.0, only the protonated state of Haloperidol is obtained. SiteMap binding site detector (5) was performed to detect druggable binding sites on both 5HK1 and 5HK2 structures. Five different binding sites for each trimer were detected. The developers of SiteMap suggest that a cut-off in the SiteScore of 0.80 can be used to differentiate between drug-binding and non-drug-binding sites, with scores higher than 1.0 being indicative of highly promising sites. Following these criteria, only the three high-ranked binding site for each trimer were considered (Supplementary Figure 7A). Molecular docking of Haloperidol ligand was conducted on each high-ranked druggable binding site of Sigmar1 receptor structures. The latter were preprocessed with the Protein Preparation Wizard from the Schrodinger Suite (4, 6-8). The protonation states of each side chain were generated using the software Epik (Schrödinger) for pH = 7 (6, 7). Protein energy minimization was performed using the OPLS3 force field (9, 10). Glide 75013 (11, 12) was used for all docking calculations. Internal and external receptor grid boxes of 10 × 10 × 10 and 20 × 20 × 20 Å were defined centered in the cupin-like β-barrel region. A standard precision (SP) Glide docking followed by Extra Precision (XP) refinement was carried out, generating at least two poses per docked molecule. Each docking result was analyzed by comparing the Glide Docking and eModel scores. The first is used for comparing different ligands, whereas the second score is suitable to rank different conformations of the same ligand.

## Animal experiments

Myocardial infarction was performed as previously described (13). Briefly, 3 months old, male mice (either CD1 or COLL-EGFP) were anesthetized with ketamine/xylazine and connected to a mouse ventilator. The left anterior descending (LAD) coronary artery was ligated 1 mm below the left atrium auricula and the effective induction of cardiac ischemia was confirmed by the whitening of the heart anterior wall. Animals were kept on a heating pad at 37°C throughout the procedure. Mice were treated with Haloperidol at a concentration of 2mg/kg IP twice a week. Animals were sacrificed at either 10 days or 8 weeks.

For bleomycin induced fibrosis, a single bolus of bleomycin (0.03 U/mouse) was injected into the trachea of 3 months old, male COLL-EGFP mice. Haloperidol (2 mg/kg) was administered intraperitoneally twice a week and mice sacrificed at 10 days. For the comparative analysis of Haloperidol, Nintedanib and Pirfenidone in bleomycin induced fibrosis for preventive protocol; all three drugs were given orally once a day by gavage at the following concentrations: Haloperidol (2 mg/kg), Nintedanib (100 mg/kg) and Pirfenidone (100 mg/kg). Mice were sacrificed after 10 days.

For the comparative analysis of Haloperidol, Nintedanib and Pirfeindone in bleomycin induced fibrosis for therapeutic protocol, all three drugs were given orally once a day by gavage after 10 days of bleomycin at the following concentrations: Haloperidol (2 mg/kg), Nintedanib (100 mg/kg) and Pirfenidone (100 mg/kg). Mice were sacrificed after 10 days.

For the induction of lung cancer, lung adenocarcinoma LG1233 cells were injected into the tail vein of syngeneic, 3 months old, male C57BL/6 mice (100,000 cells per mouse). Haloperidol (2mg/kg) was administered intraperitoneally twice a week and mice were sacrificed at 10 days.

### Echocardiography

To evaluate cardiac function, transthoracic two-dimensional echocardiography was performed on mice sedated with 5% isoflurane at 3, 5 and 8 weeks after myocardial infarction, using a Visual Sonics Vevo 2100 Ultrasound (FUJIFILM VisualSonics) equipped with a 30-MHz linear array transducer. The heart rate of all animals was kept over 400 beats per minute and the body temperature at 37°C. Systolic function was assessed on B-mode images, using a multi-planar evaluation (one long axis view and four short axis views at different levels of the left ventricle), for the quantitative estimation of systolic and diastolic volumes. The ejection fraction (EF) was calculated using a modified Simpson's rule, as per manufacturer's instructions (FUJIFILM VisualSonics). M-mode images were used to calculate fractional shortening (FS), end-diastolic left ventricular volume (EDLV) and end-systolic left ventricular volume (ESLV).

### Histology

Immunocytochemistry was performed on 4% PFA fixed, 0.5% Triton X100-permeabilized and 5% BSA-blocked cells. Immunohistochemistry was performed either on PFA-fixed cryosections or PFA-fixed paraffin-embedded sections. Cryosections were air dried and dipped briefly in acetone followed by permeabilization in 0.5% Triton X100 for 20 minutes, blocking in 5% BSA for 1 hour, incubation with primary antibodies for 16 hours and with secondary antibodies for 1 hour. Paraffin-embedded sections were deparaffinized, hydrated and processed as described for cryosections. Sections of paraffin-embedded tumor-bearing lungs were stained with hematoxylin and eosin. Paraffin-embedded sections of the heart after myocardial infarction were processed for Masson Goldner trichrome staining (Carl Roth) to determine the fibrotic area, according to manufacturer's instructions. The infarct size was measured as the percentage of the total left ventricular area showing fibrosis. Following primary antibodies were used for immunofluorescence:  $\alpha$ SMA – Cy3 (Sigma-Aldrich, clone 1A4), Vimentin (CST, D21H3), Ki-67 (CST, D3B5), Calreticulin (BD Biosciences, 612136).

### Microscopy and image analysis

Microscopy was performed using a Leica microscope equipped with a DFC300 camera and Nikon Eclipse Ti-E inverted fluorescent microscope. Confocal microscopy was performed using Zeiss LSM 880 unit and Zeiss LSM 510 META microscopes. Images were analyzed using ImageJ (NIH).

Overlap of multiple color channels of confocal images was performed with JACoP plugin in ImageJ with default parameters.

Images were analyzed using the ImageJ NIH/Fiji software. RGB images were opened to manually select all cells having an intact nucleus using the 'ROI Manager'. Images were then split into 8-bit greyscale channels and the same ROI was copied to individual channels. Fluorescence intensity in each channel was then quantified by the function 'Analyze particles', upon background subtraction.

#### Tissue distribution of Haloperidol

Tissue samples weighing about 100 – 50mg were homogenized with MagNa Lyser instrument (Roche) in 250  $\mu$ l of water before analysis by LC-MS-MS. The homogenate was then centrifuged and 125  $\mu$ l of this homogenate was mixed with 200  $\mu$ l of NaHCO<sub>3</sub>, 350  $\mu$ l of ethylacetate and 200 pg amount of internal standard (Haloperidol-D4, Cerilliant Corporation (Catalog number: H-002)). The mixture was vortexed and 150  $\mu$ l of the organic phase was transferred to a new eppendorf. The extraction was performed twice and the organic layer was then evaporated in SpeedVac. Dried extracts were resuspended in 15  $\mu$ l of 0.1% formic acid in water and 10  $\mu$ l was injected onto a 170 mm x 0.150 mm custom packed column. The column was custom packed using 5  $\mu$ m Ascentis Express RPA resin (Sigma Aldrich). The column was developed over 15 mins using a 0.1% formic acid in water to 80% acetonitrile gradient. The effluent of the column was sprayed directly into an Amazon ETD mass spectrometer (Bruker Daltonics). Haloperidol was selectively fragmented which produced two diagnostic ions at 167 and 123 m/z, and the deuterium labeled Haloperidol producing ions at 169 and 127 m/z. Haloperidol was fragmented using a trap amplitude of 0.5 for 40 ms. The fragments at 167 and 169 were used to quantitate the levels of Haloperidol. Calibration curves using lung tissue were set up using a 200 pg of deuterated Haloperidol and a range of 20 to 500 pg of unlabeled Haloperidol.



## Supplementary references

1. Magness, S.T., Bataller, R., Yang, L., and Brenner, D.A. 2004. A dual reporter gene transgenic mouse demonstrates heterogeneity in hepatic fibrogenic cell populations. *Hepatology* 40:1151-1159.
2. Dimitrova, N., Gocheva, V., Bhutkar, A., Resnick, R., Jong, R.M., Miller, K.M., Bendor, J., and Jacks, T. 2016. Stromal Expression of miR-143/145 Promotes Neoangiogenesis in Lung Cancer Development. *Cancer Discov* 6:188-201.
3. Dennler, S., Itoh, S., Vivien, D., ten Dijke, P., Huet, S., and Gauthier, J.M. 1998. Direct binding of Smad3 and Smad4 to critical TGF beta-inducible elements in the promoter of human plasminogen activator inhibitor-type 1 gene. *EMBO J* 17:3091-3100.
4. Sastry, G.M., Adzhigirey, M., Day, T., Annabhimoju, R., and Sherman, W. 2013. Protein and ligand preparation: parameters, protocols, and influence on virtual screening enrichments. *Journal of Computer-Aided Molecular Design* 27:221-234.
5. Halgren, T.A. 2009. Identifying and characterizing binding sites and assessing druggability. *Journal of Chemical Information and Modeling* 49:377-389.
6. Greenwood, J.R., Calkins, D., Sullivan, A.P., and Shelley, J.C. 2010. Towards the comprehensive, rapid, and accurate prediction of the favorable tautomeric states of drug-like molecules in aqueous solution. *Journal of Computer-Aided Molecular Design* 24:591-604.
7. Shelley, J.C., Cholleti, A., Frye, L.L., Greenwood, J.R., Timlin, M.R., and Uchimaya, M. 2007. Epik: a software program for pK a prediction and protonation state generation for drug-like molecules. *Journal of Computer-Aided Molecular Design* 21:681-691.
8. Jacobson, M.P., Friesner, R.A., Xiang, Z., and Honig, B. 2002. On the Role of the Crystal Environment in Determining Protein Side-chain Conformations. *Allosteric Interactions and Biological Regulation (Part II)* 320:597-608.
9. Harder, E., Damm, W., Maple, J., Wu, C., Reboul, M., Xiang, J.Y., Wang, L., Lupyan, D., Dahlgren, M.K., Knight, J.L., et al. 2016. OPLS3: A Force Field Providing Broad Coverage of Drug-like Small Molecules and Proteins. *Journal of Chemical Theory and Computation* 12:281-296.
10. Jorgensen, W.L., Maxwell, D.S., and Tirado-Rives, J. 1996. Development and Testing of the OPLS All-Atom Force Field on Conformational Energetics and Properties of Organic Liquids. *Journal of the American Chemical Society* 118:11225-11236.
11. Friesner, R.A., Banks, J.L., Murphy, R.B., Halgren, T.A., Klicic, J.J., Mainz, D.T., Repasky, M.P., Knoll, E.H., Shelley, M., Perry, J.K., et al. 2004. Glide: a new approach for rapid, accurate docking and scoring. 1. Method and assessment of docking accuracy. *Journal of Medicinal Chemistry* 47:1739-1749.
12. Halgren, T.A., Murphy, R.B., Friesner, R.A., Beard, H.S., Frye, L.L., Pollard, W.T., and Banks, J.L. 2004. Glide: a new approach for rapid, accurate docking and scoring. 2. Enrichment factors in database screening. *Journal of Medicinal Chemistry* 47:1750-1759.
13. Eulalio, A., Mano, M., Dal Ferro, M., Zentilin, L., Sinagra, G., Zacchigna, S., and Giacca, M. 2012. Functional screening identifies miRNAs inducing cardiac regeneration. *Nature* 492:376-381.



Supplementary figure 1

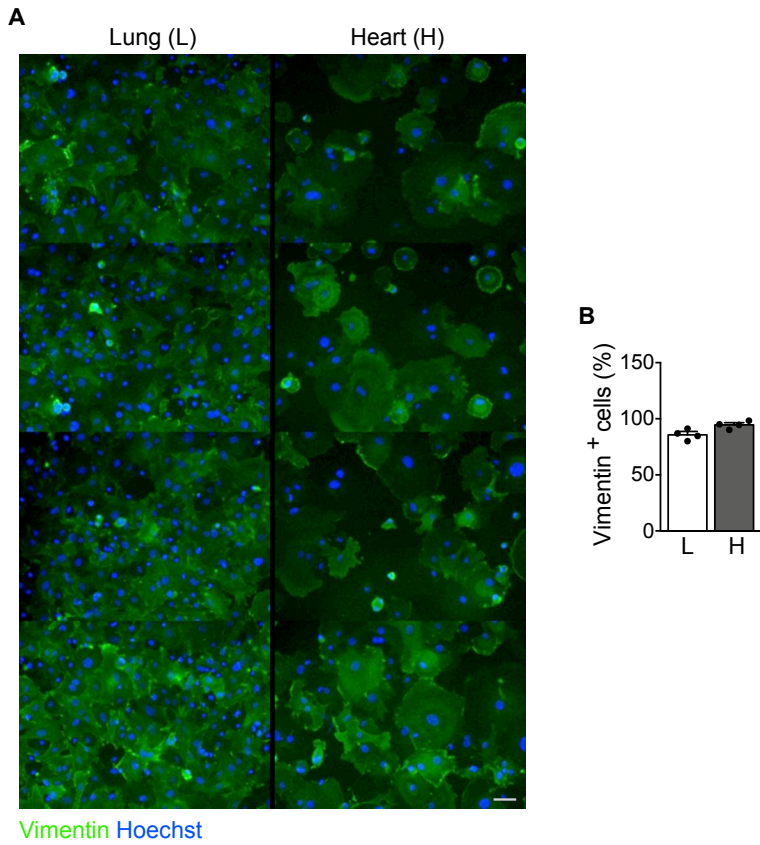

**Supplementary Figure 1. Purity of fibroblast isolation.** (A) Primary fibroblasts from lung (L) and heart (H) stained with anti-vimentin antibodies (green). Nuclei are stained in blue with Hoechst. Scale bar, 15 $\mu$ m. (B) Quantification of the percentage of vimentin<sup>+</sup> cells in primary cultures of fibroblasts from lung (L) and heart (H) (n = 4/gp). Values are mean  $\pm$  SEM.

Supplementary figure 2.

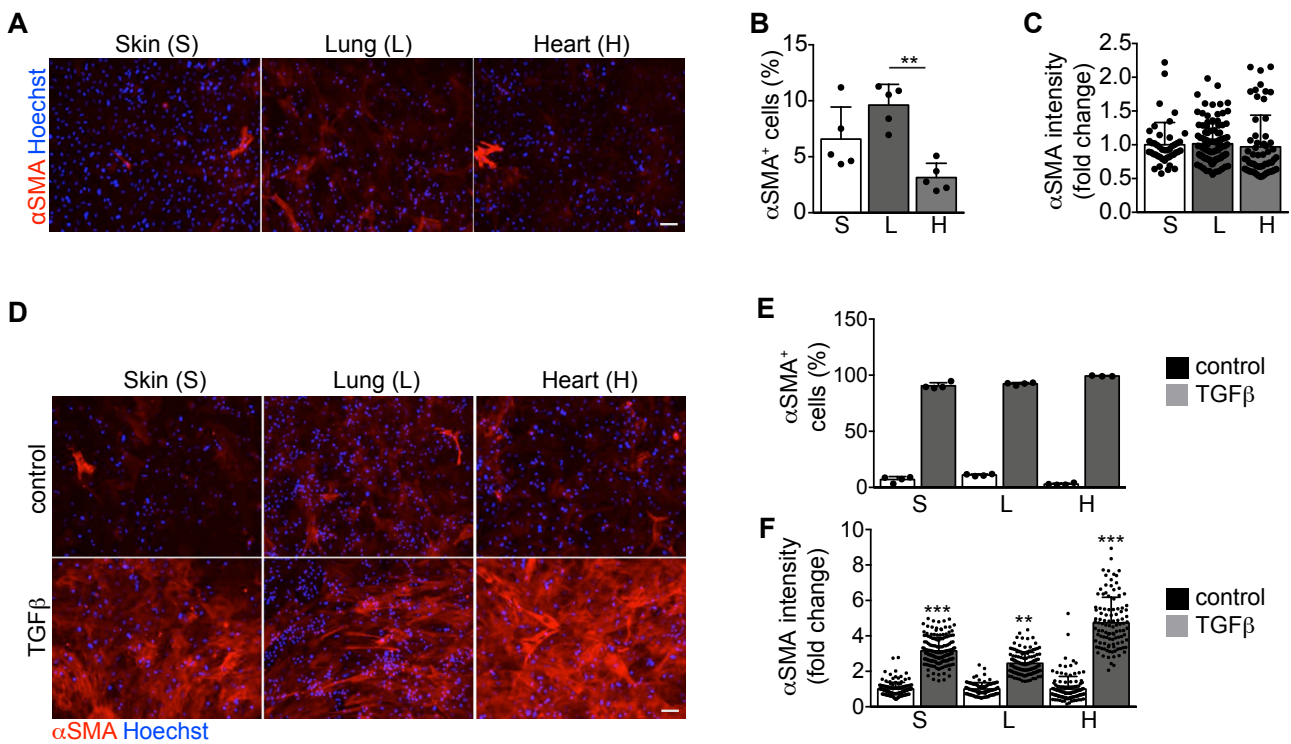

**Supplementary Figure 2. Fibroblasts from different tissues are differentially prone to undergo myofibroblast differentiation.** (A) Primary fibroblasts from skin (S), lung (L) and heart (H) are stained with anti- $\alpha$ SMA antibodies (red) and nuclei are stained blue with Hoechst. (B) Quantification of the number of  $\alpha$ SMA<sup>+</sup> fibroblasts from skin (S), lung (L) and heart (H) (n = 5/gp). (C) Quantification of the  $\alpha$ SMA mean fluorescence intensity in fibroblasts from skin (S), lung (L) and heart (H) (n > 44 cells/gp). (D) Primary fibroblasts from skin (S), lung (L) and heart (H) are stained with anti- $\alpha$ SMA antibodies (red) upon treatment with TGF $\beta$  (25 ng/ml) for 72 hours. Nuclei are stained in blue with Hoechst. (E) Quantification of the number of  $\alpha$ SMA<sup>+</sup> positive fibroblasts from skin (S), lung (L) and heart (H) upon TGF $\beta$  stimulation (n = 4/gp). (F) Quantification of the  $\alpha$ SMA mean fluorescence intensity in fibroblasts from skin (S), lung (L) and heart (H) upon TGF $\beta$  stimulation (n > 40/gp) Values in B and E are mean  $\pm$  SEM. Values in C and F are mean  $\pm$  SD, representative of three independent experiments with similar results. \*P<0.05, \*\*P<0.01, \*\*\*P<0.001 by unpaired t-test. Scale bar in A and D, 50 $\mu$ m.

Supplementary figure 3.

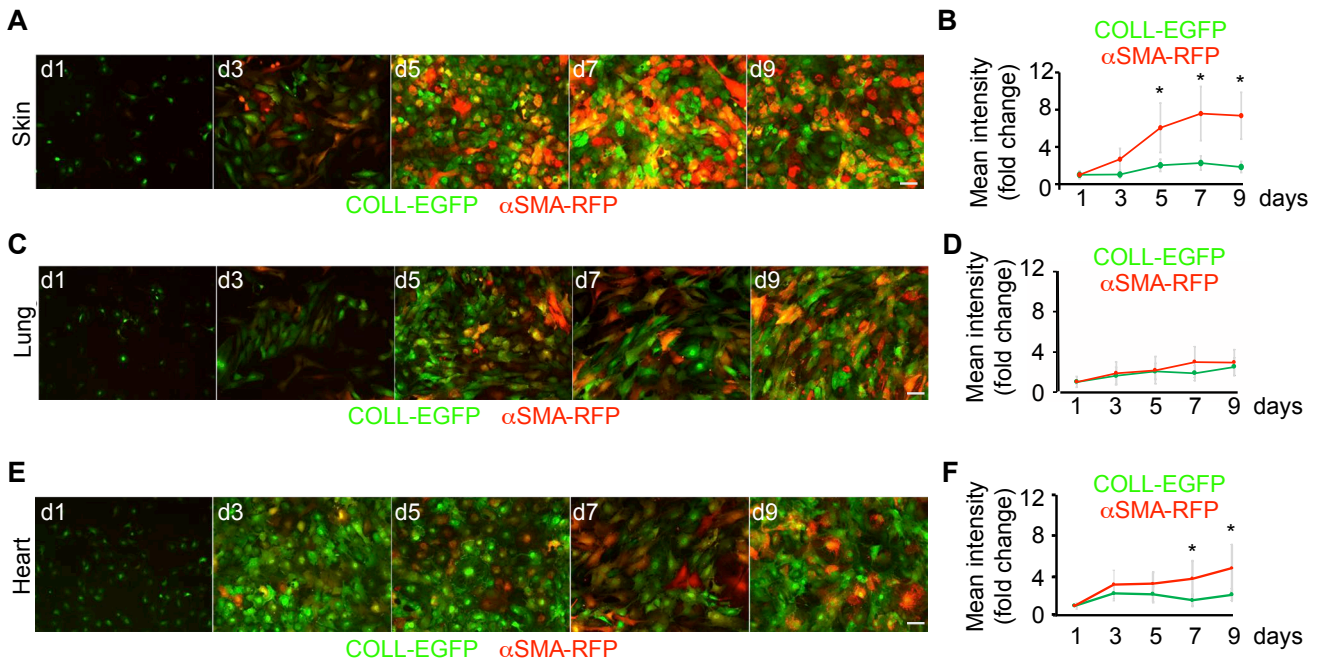

**Supplementary Figure 3. Primary fibroblasts from skin, lung and heart of  $\alpha$ SMA-RFP/COLL-EGFP mice undergo spontaneously differentiation over time. Green fluorescence indicates collagen expression, whereas red fluorescence indicates  $\alpha$ SMA expression. (A) Representative images of skin fibroblasts from day 1 (d1) to day 9 (d9) of culture. (B) Quantification of the  $\alpha$ SMA (red line) and collagen (green line) mean fluorescence intensity in skin fibroblasts from  $\alpha$ SMA-RFP/COLL-EGFP mice over time. (C) Representative images of lung fibroblasts from day 1 (d1) to day 9 (d9) of culture. (D) Quantification of the  $\alpha$ SMA (red line) and collagen (green line) mean fluorescence intensity in lung fibroblasts from  $\alpha$ SMA-RFP/COLL-EGFP mice over time. (E) Representative images of heart fibroblasts from day 1 (d1) to day 9 (d9) of culture. (F) Quantification of the  $\alpha$ SMA (red line) and collagen (green line) mean fluorescence intensity in heart fibroblasts from  $\alpha$ SMA-RFP/COLL-EGFP mice over time. Values are mean  $\pm$  SEM relative to day 1. \* $P < 0.05$  by unpaired t-test. Scale bar in A, C, E, 50 $\mu$ m.**

Supplementary figure 4.

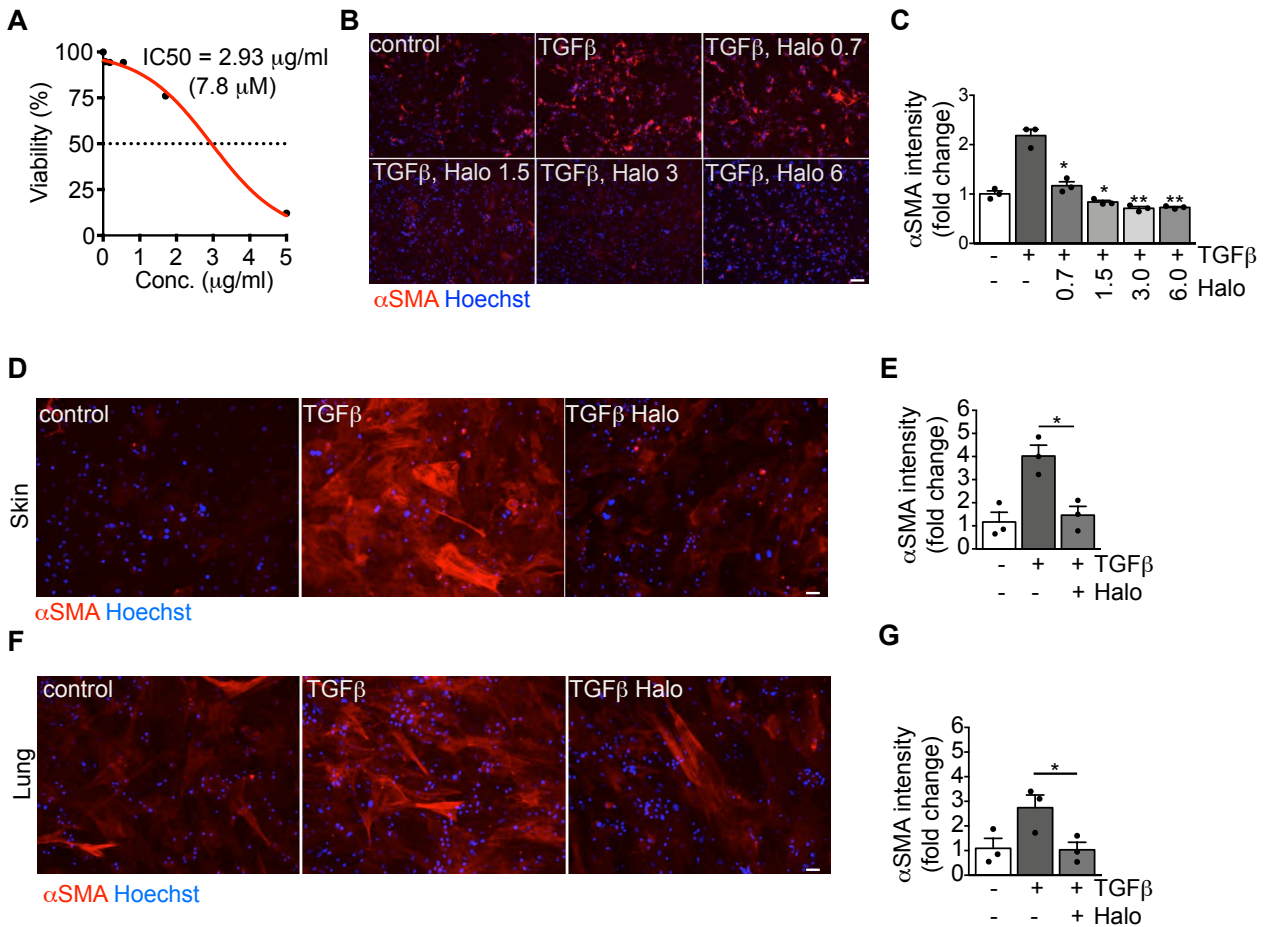

**Supplementary Figure 4. Fibroblasts from different tissues comparably respond to haloperidol.** (A) Different concentrations (conc.) of Haloperidol were tested on cardiac fibroblasts and viability assessed by MTT assay. Every dot shows the mean of a biological duplicate. The dose of Haloperidol killing 50% of the cells is indicated as IC<sub>50</sub>. (B) Representative images of  $\alpha\text{SMA}$ -stained cardiac fibroblasts (red) treated with TGF $\beta$ , Haloperidol and their combination with increasing concentrations of Haloperidol (0.7, 1.5, 3 and 6  $\mu\text{M}$ ). Nuclei are stained in blue with Hoechst. (C) Quantification of the  $\alpha\text{SMA}$  mean fluorescence intensity upon treatment with TGF $\beta$ , Haloperidol and their combination with the indicated dose ( $\mu\text{M}$ ) of Haloperidol ( $n = 3/\text{gp}$ ). (D) Primary skin fibroblasts treated with TGF $\beta$ , Haloperidol and their combination and stained with anti- $\alpha\text{SMA}$  antibodies. Nuclei are stained in blue with Hoechst. (E) Quantification of the  $\alpha\text{SMA}$  mean fluorescence intensity in skin fibroblasts upon treatment with TGF $\beta$ , Haloperidol and their combination with Haloperidol ( $n = 3/\text{gp}$ ). (F) Primary lung fibroblasts treated with TGF $\beta$ , Haloperidol and their combination and stained with anti- $\alpha\text{SMA}$  antibodies. Nuclei are stained in blue with Hoechst. (G) Quantification of the  $\alpha\text{SMA}$  mean fluorescence intensity in lung fibroblasts upon treatment with TGF $\beta$ , Haloperidol and their combination ( $n = 3/\text{gp}$ ). Scale bar in B, D and F, 50 $\mu\text{m}$ . Values in C, E and G are mean  $\pm$  SEM. Significance in the C are shown compared to TGF $\beta$ ). \* $P < 0.05$ , \*\* $P < 0.01$ , \*\*\* $P < 0.001$  by unpaired t-test. (

Supplementary figure 5.

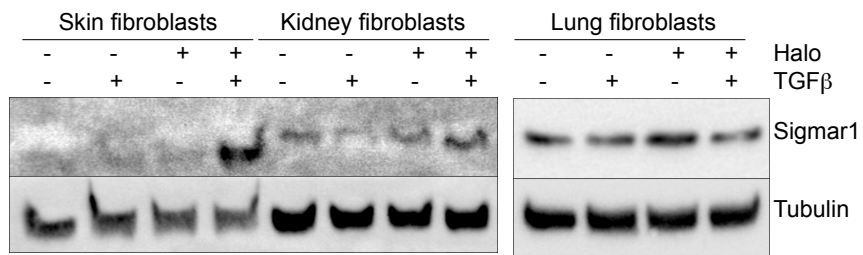

**Supplementary Figure 5. Haloperidol up-regulates Sigmar1 in fibroblasts.** Western blot showing the expression of Sigmar1 upon treatment with TGF $\beta$ , Haloperidol and their combination in primary adult skin, kidney, and lung fibroblasts. Tubulin is used as a loading control.



Supplementary figure 6.

**A**

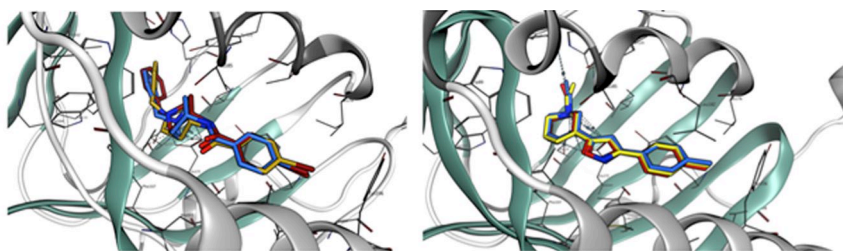

**B**

RMSD = 0.546 Å

|           | 1    | 2    | 3    | 4    | 5    | 6    |     |
|-----------|------|------|------|------|------|------|-----|
| 1: SHK2.A | 0.00 | 0.67 | 0.62 | 0.66 | 0.69 | 0.66 | 4.8 |
| 2: SHK2.B | 0.67 | 0.00 | 0.58 | 0.57 | 0.38 | 0.40 | 3.8 |
| 3: SHK2.C | 0.62 | 0.58 | 0.00 | 0.37 | 0.52 | 0.51 | 2.5 |
| 4: SHK1.A | 0.66 | 0.57 | 0.37 | 0.00 | 0.48 | 0.45 | 2.0 |
| 5: SHK1.B | 0.69 | 0.38 | 0.52 | 0.48 | 0.00 | 0.47 | 1.5 |
| 6: SHK1.C | 0.66 | 0.40 | 0.51 | 0.45 | 0.47 | 0.00 | 1.0 |
|           |      |      |      |      |      |      | 0.5 |
|           |      |      |      |      |      |      | 0.0 |

**C**

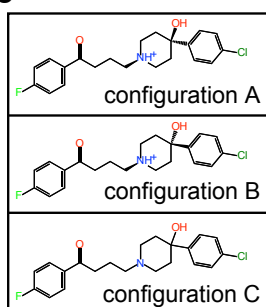

**D**

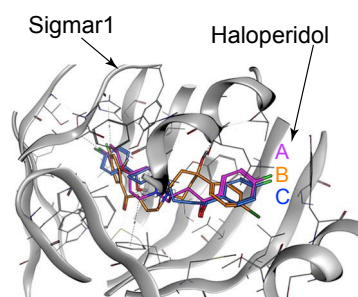

**E**

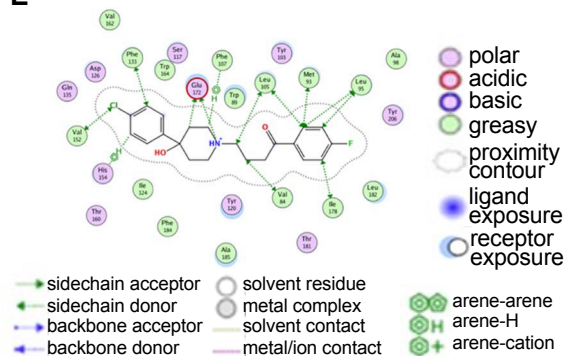

**Supplementary Figure 6. Molecular docking of Haloperidol in Sigmar1.** (A) Superimposition of the three Sigmar1 binding sites in 5HK1 (left) and 5HK2 (right) monomers with the known ligands, 3-(4-methylphenyl)-5-(1-propyl-3,6-dihydro-2H-pyridin-5-yl)-1,2-oxazole and N-(1-benzylpiperidin-4-yl)-4-iodobenzamide. Red, blue and yellow corresponds to the three main configurations of the ligands bound to each Sigmar1 monomer. The Sigmar1 protein is in cartoon representation. (B) Root Mean Square Deviation (RMSD) in Armstrong (Å) of the six identified binding sites. (C) Two-dimensional structure of the three different Haloperidol configurations at pH=7 evaluated with LigPrep, Schrodinger Suite. Atom color assignment: black, carbon; red, oxygen; green, halogen; blue, nitrogen. (D) Tri-dimensional view of the highest ranked binding poses for the three configurations of Haloperidol shown in c. Sigmar1 protein is represented in grey cartoon, while the ligands are in purple (configuration A), orange (configuration B) and blue (configuration C). (E) Schematic representation of the highest ranked Haloperidol binding pose (5HK1 chain B Halo conf. A) according to Glide Docking and Emodel score, with indication of the nature of residues interacting with Haloperidol within the binding cavity of Sigmar1.



Supplementary figure 7.

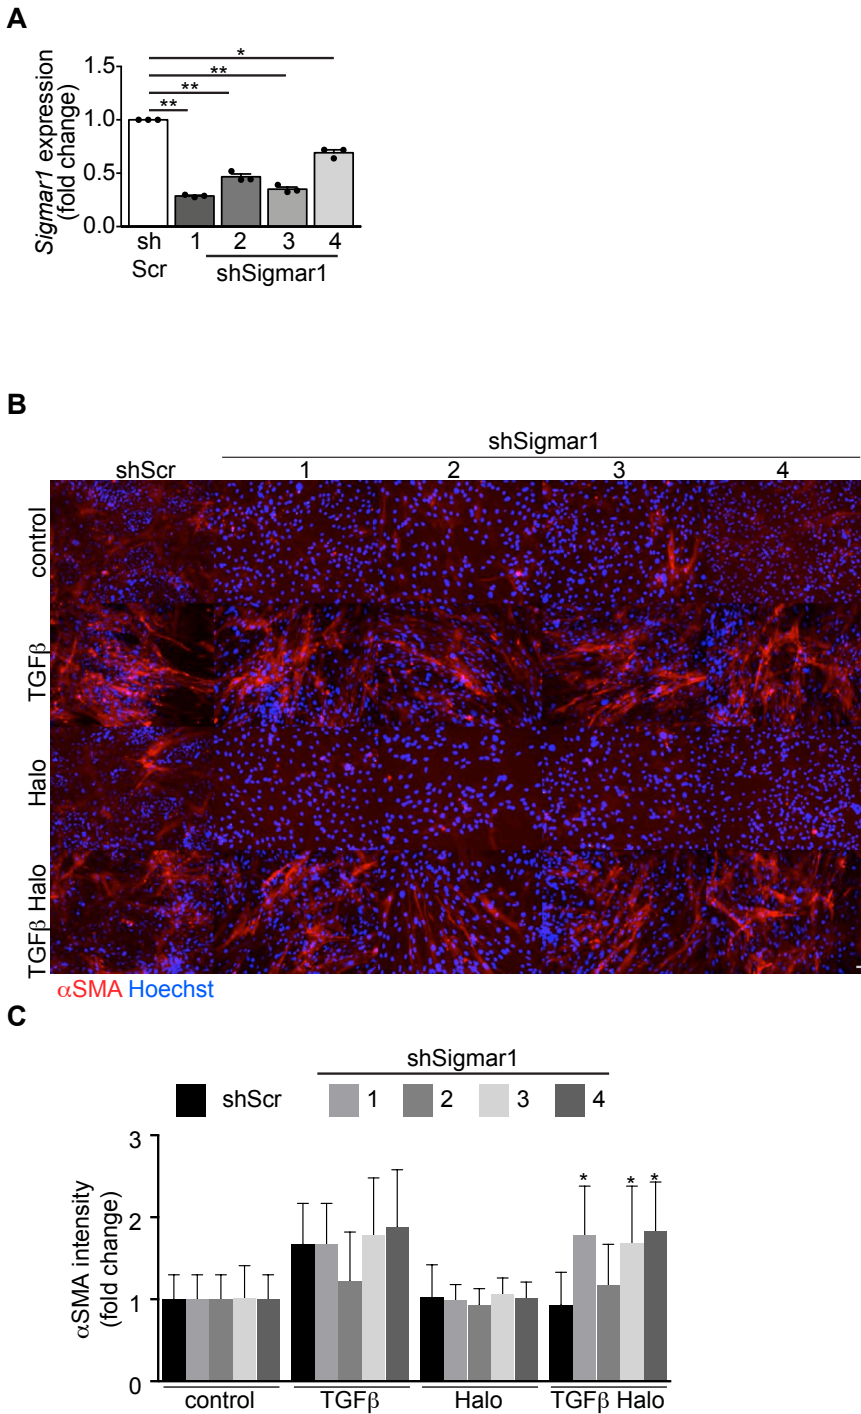

**Supplementary Figure 7. Haloperidol requires Sigmar1 to inhibit  $\alpha$ SMA expression in NIH3T3 cells.** (A) Quantitative real time PCR for mRNA expression of *Sigmar1* after its silencing with four different shRNAs in NIH3T3 cells (n = 3/gp). The scrambled sequence of shSigmar1-1 was used a control. (B)  $\alpha$ SMA staining (red) of NIH3T3 cells after Sigmar1 silencing with the four shRNAs and treatment with TGF $\beta$ , Haloperidol and their combination. Nuclei are stained in blue with Hoechst. Scale bar, 50  $\mu$ m. (C) Quantification of the mean  $\alpha$ SMA intensity in NIH3T3 cells after Sigmar1 silencing with the four shRNAs and treatment with TGF $\beta$ , Haloperidol and their combination (n = 3/gp). Values in A and C are mean  $\pm$  SEM. \*P<0.05, \*\*P<0.01 relative to control by unpaired t-test.

Supplementary figure 8.

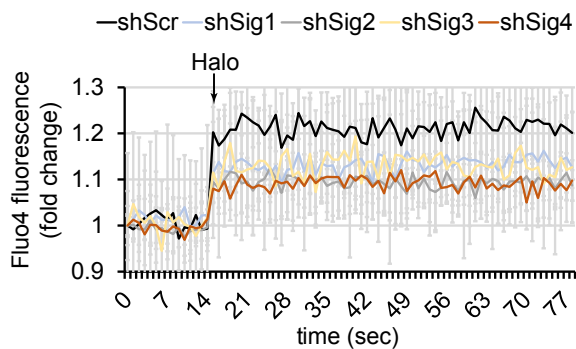

**Supplementary Figure 8. Effect of Sigmar1 silencing on Haloperidol-induced Fluo4 fluorescence activity.**

Quantification of the Fluo4 fluorescence intensity in NIH3T3 cells treated with Haloperidol (arrow) in combination with either a scrambled shRNA (black line) or the four shRNAs silencing Sigmar1 (blue, grey, yellow and orange lines). The average of three biological replicates with SD is plotted.

Supplementary figure 9.

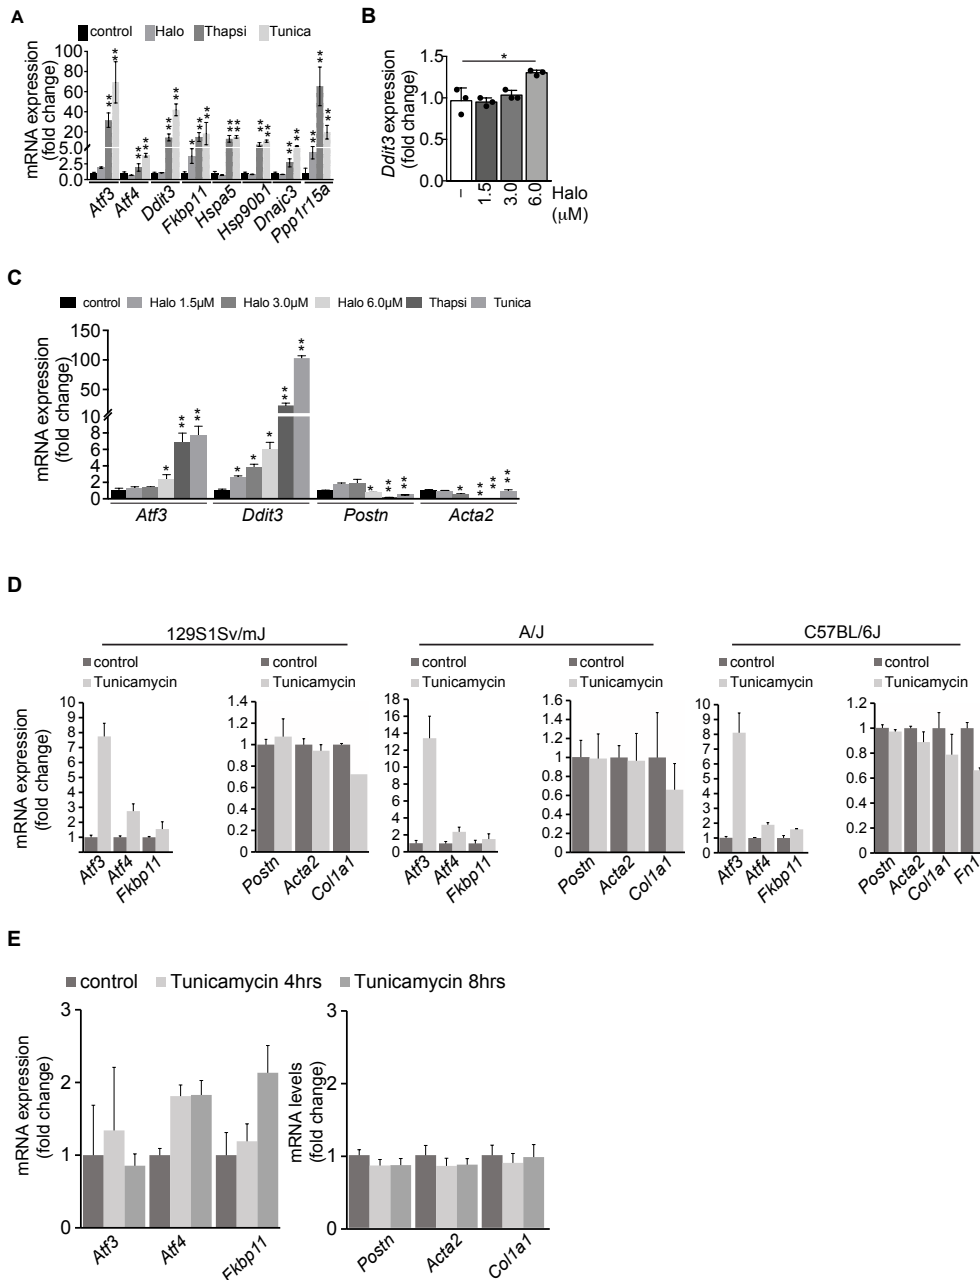

**Supplementary Figure 9.** Analysis of ER stress and fibrotic genes in different fibroblasts. **(A)** Levels of mRNA expression of activating transcription factor 3 and 4 (*Atf3*, *Atf4*), DNA-damage inducible transcript 3 (*Ddit3*), FK506 binding protein 11 (*Fkbp11*), heat shock protein 5 (*Hspa5*), heat shock protein 90, beta member 1 (*Hsp90b1/Grp94*), DnaJ Hsp40 member C3 (*Dnajc3*) and protein phosphatase 1, regulatory subunit 15A (*Ppp1r15a* / *Gadd34*), upon treatment with Haloperidol, Thapsigargin, and Tunicamycin (n = 3/gp). **(B)** Levels of *Ddit3* in response to the indicated doses of Haloperidol (n = 3/gp). **(C)** Real-time quantification of mRNA expression of *Atf3*, *Chop*, *Postn* and *Acta2* in primary adult murine lung fibroblasts treated with increasing doses of Haloperidol (Halo), Thapsigargin (Thapsi) and Tunicamycin (Tunica) (n = 3/gp). **(D)** Analysis of mRNA expression of the indicated genes upon treatment of mouse embryonic fibroblasts (MEFs) from the indicated strains with Tunicamycin, as reported in the publicly available microarray dataset GSE63756. **(E)** Analysis of mRNA expression of the indicated genes upon treatment of C57BL/6 mouse embryonic fibroblasts (MEFs) with Tunicamycin at the indicated time points, as reported in the publicly available microarray dataset GSE2082. Values in A, B, C, D and E are mean  $\pm$  SEM. \*P<0.05, \*\*P<0.01 by unpaired t-test relative to control.

Supplementary figure 10.

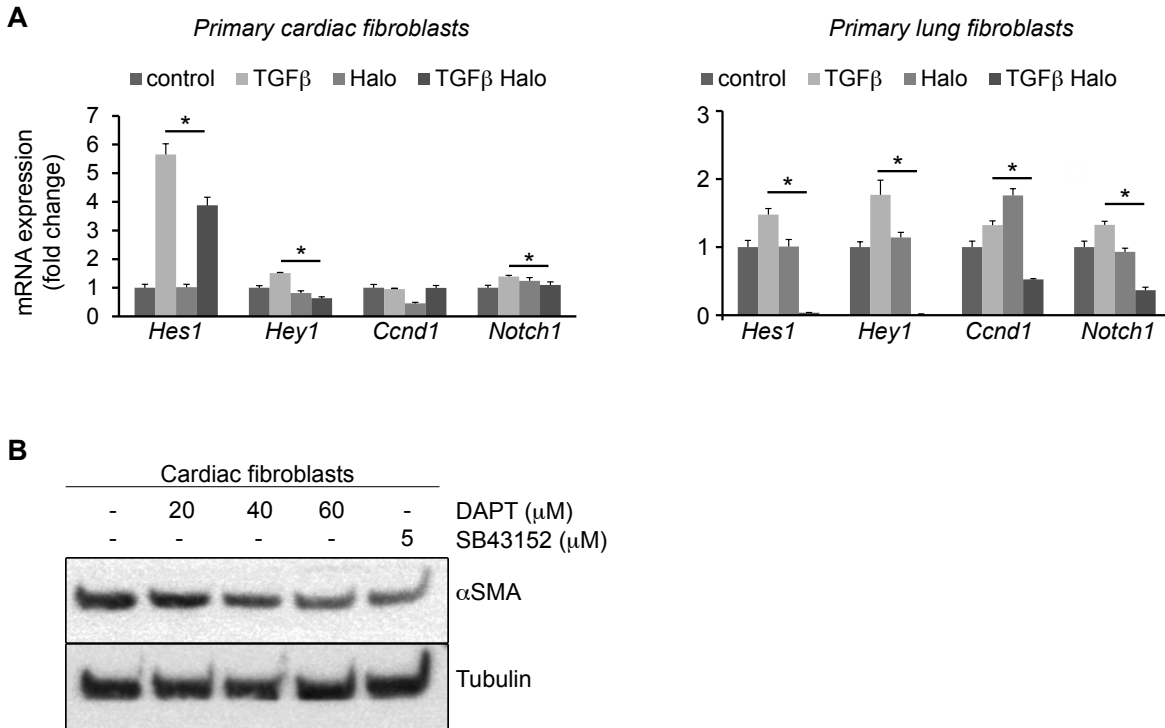

**Supplementary Figure 10. Regulation of the Notch pathway by Haloperidol.** (A) Quantification of the mRNA expression of the Notch target genes *Hes1*, *Hey1*, *Ccnd1* and *Notch1* itself, after 3 days of treatment with TGFβ alone or in combination with Haloperidol in cardiac and lung fibroblasts. (n = 3/gp). Values are mean ± SEM. \*P<0.05 by unpaired two tailed t-test with Welch's correction relative to control (B) Western blot showing the expression of αSMA levels upon treatment of cardiac fibroblasts with the indicated doses of either the gamma secretase inhibitor DAPT or the TGFβ inhibitor SB43152. Tubulin is used as a loading control.

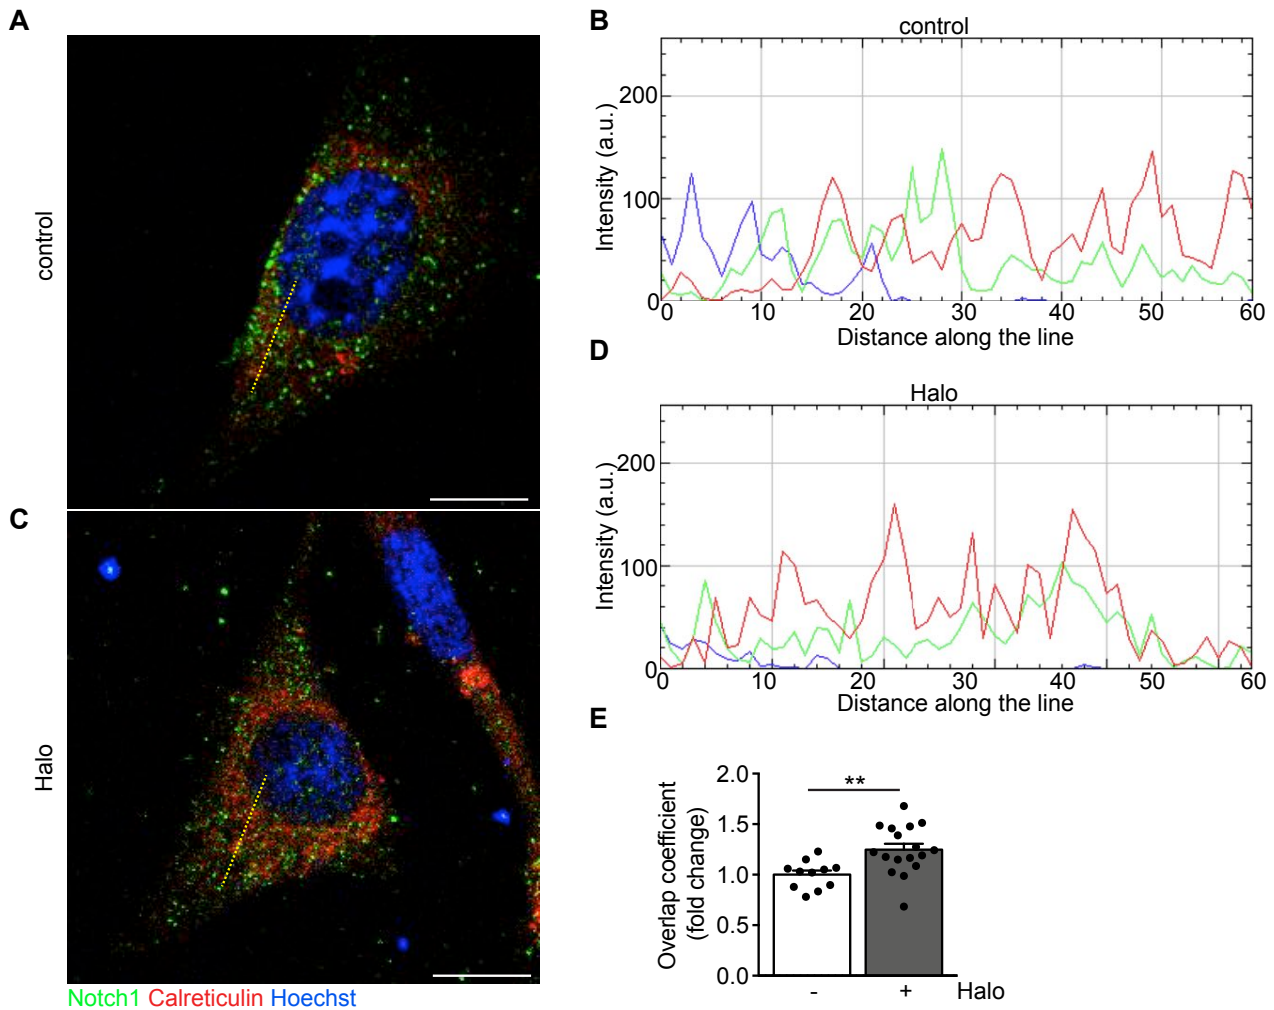

**Supplementary Figure 11. Localization of Notch1 with ER marker upon Haloperidol treatment and effect on Golgi complex.** (A,C) Representative images of untreated cardiac fibroblasts or treated with Haloperidol for 72 hours and stained with anti-Notch1 (green) and anti-Calreticulin (red) antibodies. Nuclei are stained in blue with Hoechst. (B,D) RGB profile on the dashed line marked in (A,C). (E) Quantification of overlap coefficient between Notch1 and Calreticulin in untreated fibroblasts and treated with Haloperidol ( $n > 11/gp$ ). Values are mean  $\pm$  SD. Data are representative of three independent experiments with similar results. \*\* $P < 0.01$  by unpaired t-test relative to control. Scale bar in A,C,  $10\mu\text{m}$ .

Supplementary figure 12.

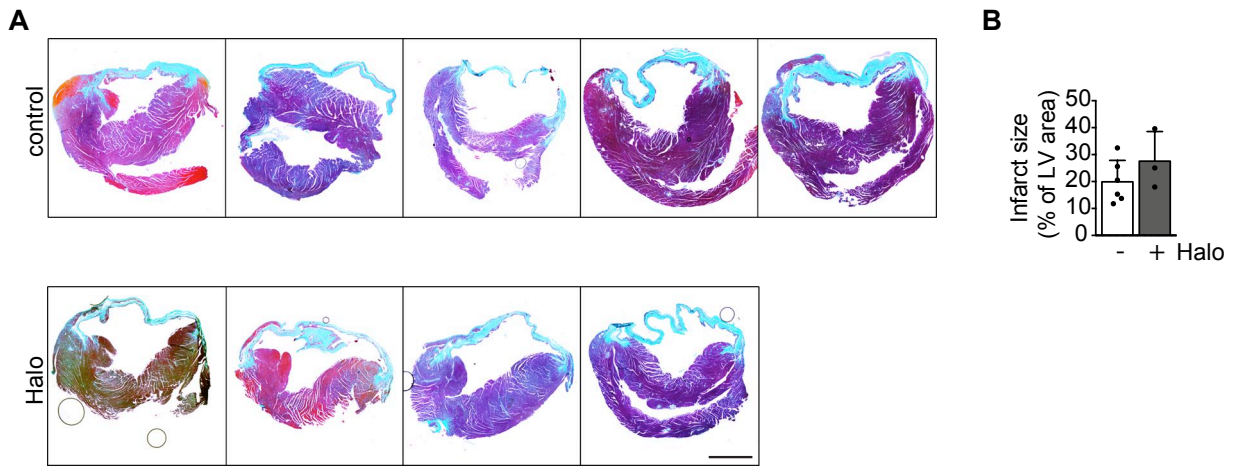

**Supplementary Figure 12. Outcome of MI.** (A) Masson Trichrome staining of heart sections of mice treated with either PBS (control) or Haloperidol treated at 8 weeks after MI. (B) Quantification of infarct size in the hearts of mice treated with either PBS (control) or Haloperidol treated at 8 weeks after MI (n >5/gp). Values are mean  $\pm$  SEM. Scale bar, 1 mm.



Supplementary Figure 13.

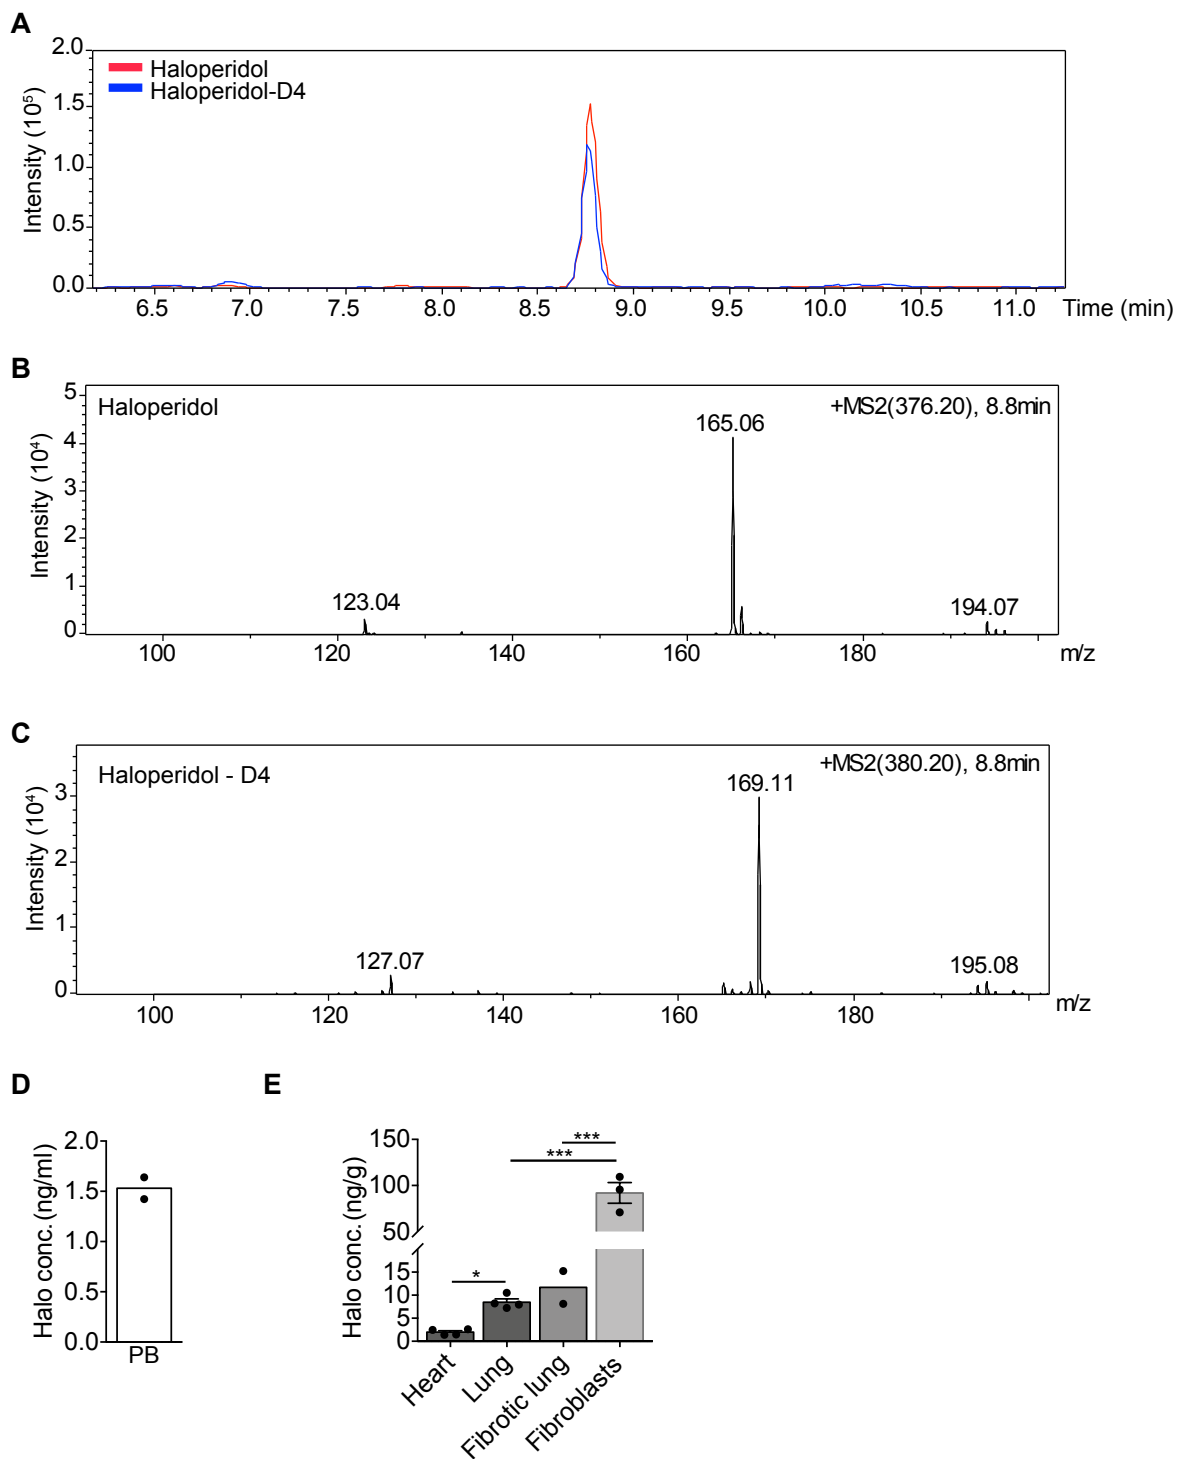

**Supplementary Figure 13. Tissue distribution of Haloperidol.** (A) Representative chromatogram of a mixture of Haloperidol and Haloperidol-D4. (B) MS/MS spectra of Haloperidol. (C) MS/MS spectra of Haloperidol-D4. (D) Tissue concentration of Haloperidol in peripheral blood (PB) ( $n = 2$ ). (E) Tissue concentration of Haloperidol in heart ( $n = 4$ ), lung ( $n = 4$ ), bleomycin-treated, fibrotic lungs ( $n = 2$ ) and primary lung fibroblasts in culture ( $n = 3$ ). Values are mean  $\pm$  SEM. \* $P < 0.05$ , \*\*\* $P < 0.001$  by unpaired t-test.

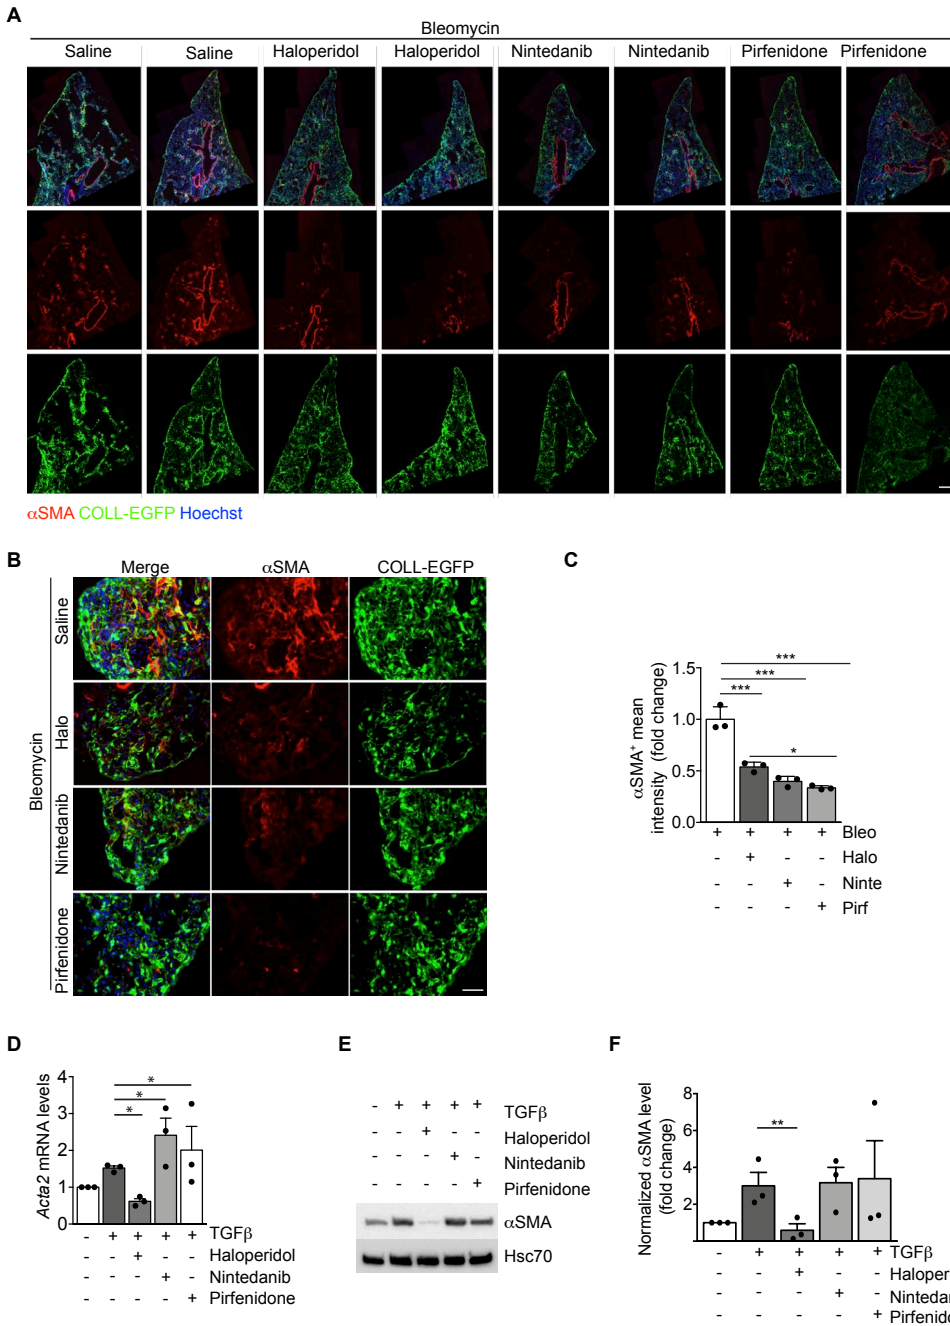

**Supplementary Figure 14. Comparison of the effect of Haloperidol, Nintedanib and Pirfenidone in a preventive protocol.** (A) Representative images of lung sections of COLL-EGFP mice exposed to Bleomycin and treated with Haloperidol, Nintedanib and Pirfenidone and stained with anti- $\alpha$ SMA antibody (white). Nuclei are stained in blue with Hoechst. (B) Higher magnification images of extravascular regions of lungs of COLL-EGFP mice exposed to Bleomycin and treated with Haloperidol, Nintedanib and Pirfenidone. (C) Quantification of the  $\alpha$ SMA mean intensity in fibroblasts of lungs exposed to Bleomycin and treated with Haloperidol, Nintedanib and Pirfenidone (n = 3/gp). (D) Real-time quantify cation of mRNA expression of *Acta2* normalized to *Gapdh* in primary adult murine lung fibroblasts treated with TGF $\beta$  alone and in combination with Haloperidol, Nintedanib and Pirfenidone (n = 3/gp). (E) Western blot showing the expression of  $\alpha$ SMA upon treatment of lung fibroblasts with TGF $\beta$  alone and in combination with Haloperidol, Nintedanib and Pirfenidone. Hsc70 is used as loading control. (F) Densitometric analysis of  $\alpha$ SMA normalized to Hsc70 (n = 3/gp). Scale bar, 1 mm in A; 25 $\mu$ m in B. Values in C, D and F are mean  $\pm$  SEM. \*P<0.05, \*\*P<0.01, \*\*\*P<0.001 by one-way ANOVA and Dunnett's multiple comparisons post-hoc test in C and unpaired t-test in D and F.

**A**

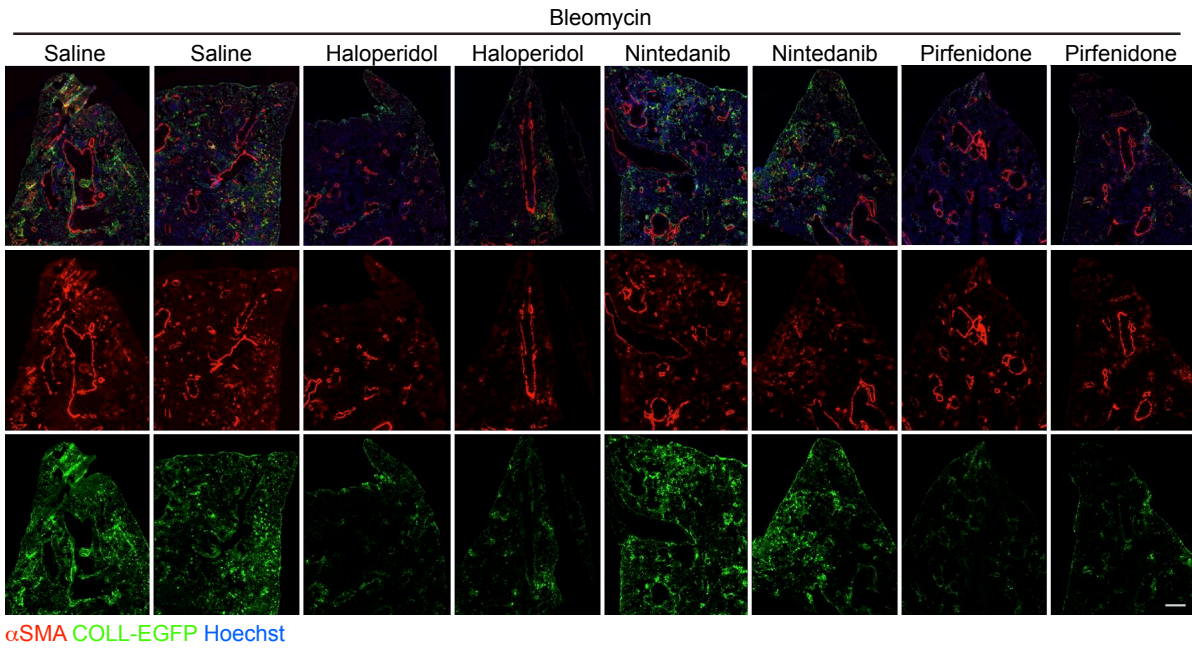

**B**

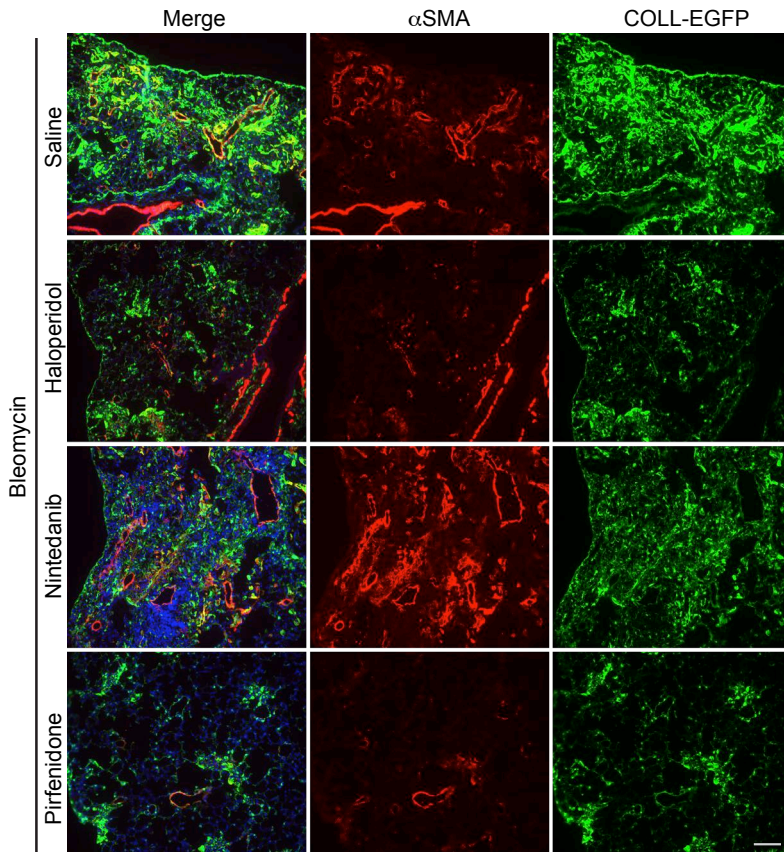

**C**

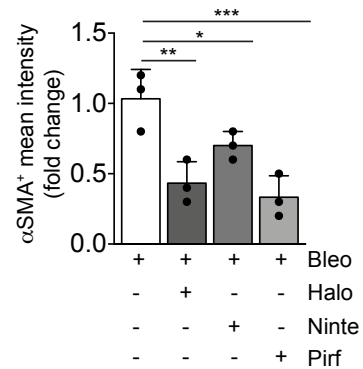

**Supplementary Figure 15. Comparative analysis of Haloperidol, Nintedanib and Pirfenidone in a therapeutic protocol.** (A) Representative images of lung sections of COLL-EGFP mice exposed to Bleomycin and treated with Haloperidol, Nintedanib and Pirfenidone and stained with anti- $\alpha$ SMA antibody (white). Nuclei are stained in blue with Hoechst. (B) Higher magnification images of extravascular regions of lungs of COLL-EGFP mice exposed to Bleomycin and treated with Haloperidol, Nintedanib and Pirfenidone. (C) Quantification of the  $\alpha$ SMA mean intensity in fibroblasts of lungs exposed to Bleomycin and treated with Haloperidol, Nintedanib and Pirfenidone ( $n = 3$ /gp). Values are mean  $\pm$  SEM. \* $P < 0.05$ , \*\* $P < 0.01$ , \*\*\* $P < 0.001$  by one-way ANOVA and Dunnett's multiple comparisons post-hoc test. Scale bar, 1 mm in A; 25  $\mu$ m in B.



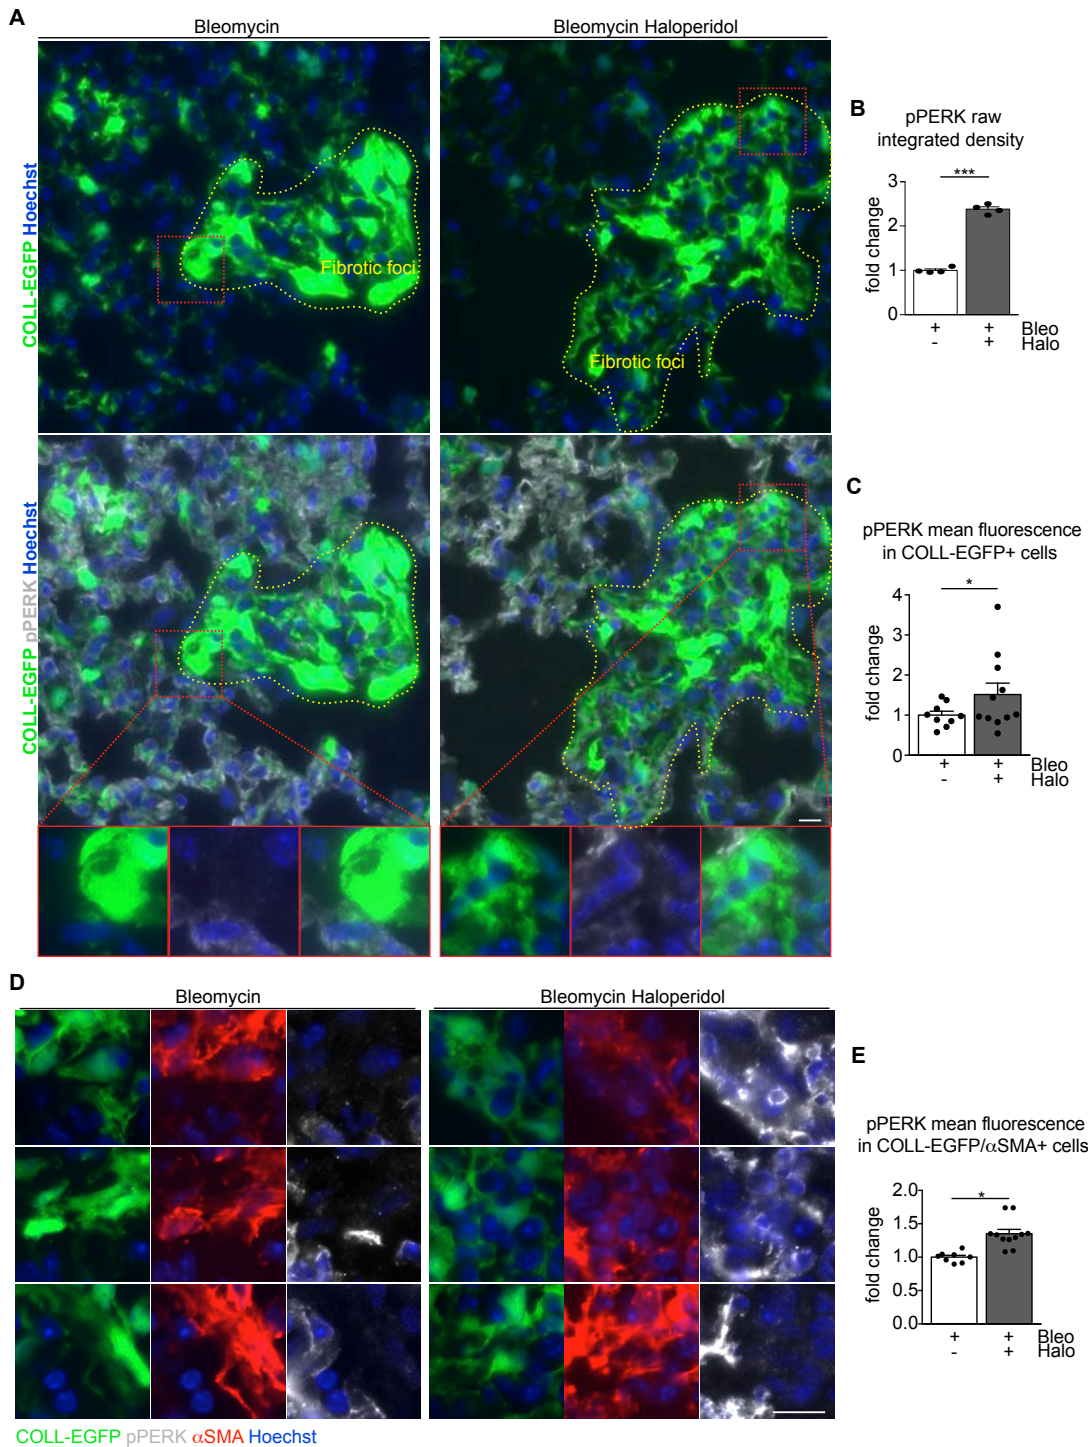

**Supplementary Figure 16. Modulation of ER stress in vivo by Haloperidol.** (A) Representative images of lung sections of COLL-EGFP mice exposed to Bleomycin either in the presence or in the absence of Haloperidol and stained with pPERK antibodies (white). Fibrotic foci are indicated by the dashed, yellow line. Nuclei are stained in blue with Hoechst. The lower panels show high magnification of the inset area. (B) Raw integrated density of fluorescence intensity of pPERK normalized to total number of nuclei in mice exposed to Bleomycin and treated with Haloperidol (n = 6/gp). (C) Quantification of the pPERK mean fluorescence intensity in COLL-EGFP<sup>+</sup> fibroblasts of lungs exposed to Bleomycin and treated with Haloperidol. (n >5/gp). (D) Representative images of three fields of fibrotic foci in lungs of COLL-EGFP mice exposed to Bleomycin and treated with Haloperidol, upon staining with anti- $\alpha$ SMA and anti-pPERK antibodies. Nuclei are stained in blue with Hoechst. (E) Quantification of the pPERK mean intensity in COLL-EGFP<sup>+</sup>  $\alpha$ SMA<sup>+</sup> fibroblasts of lungs exposed to Bleomycin and treated with Haloperidol (n = 6/gp). Scale bar, 50 $\mu$ m in A,D. Values in B, C and E are mean  $\pm$  SEM. \*P<0.05, \*\*\*P<0.001 by unpaired t-test, relative to control.

**A**

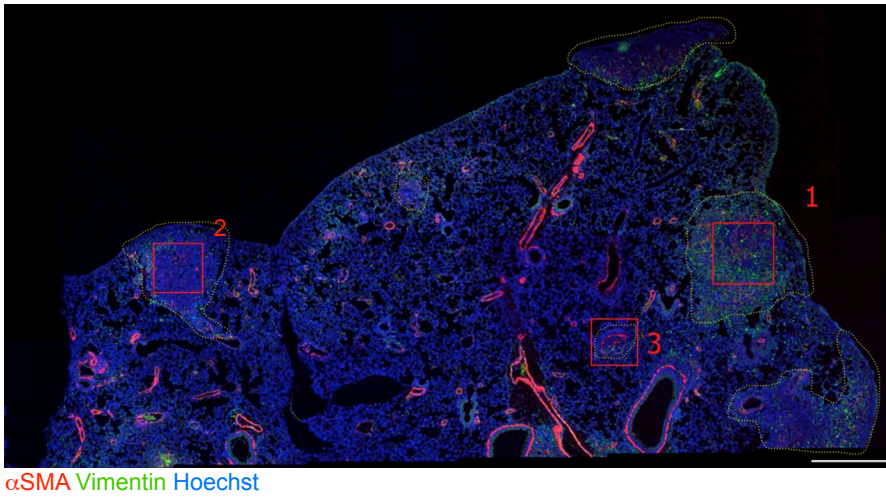

**B**

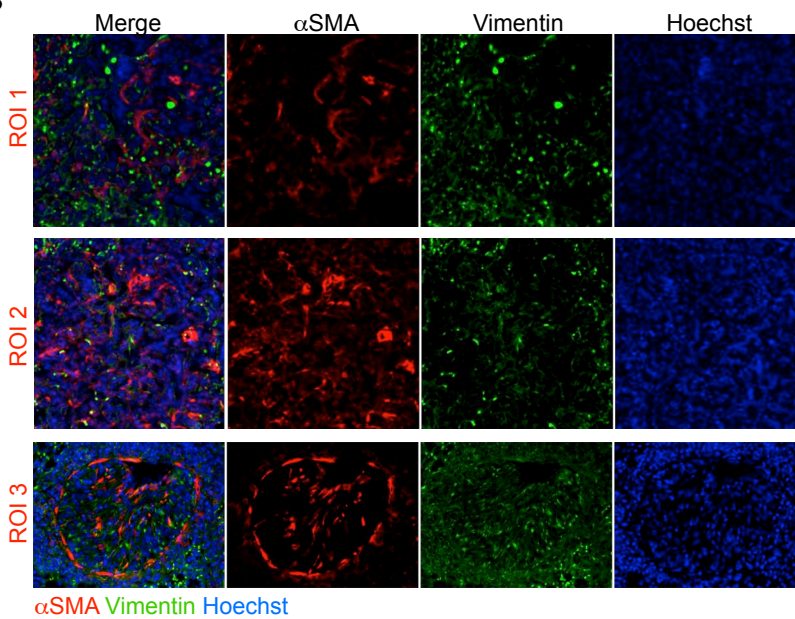

**Supplementary Figure 17. Myofibroblasts infiltrate lung cancer.** (A) Representative section of a tumor-bearing lung at 10 days after LG cell injection, stained with anti- $\alpha$ SMA antibodies in red and anti-vimentin antibodies in green. Nuclei are stained in blue with Hoechst. Tumor foci are shown by the dotted, yellow line. (B) High magnification details of the three regions of interests (ROIs) indicated as red squares in A. Scale bar, 1 mm.

Supplementary figure 18.

**A**

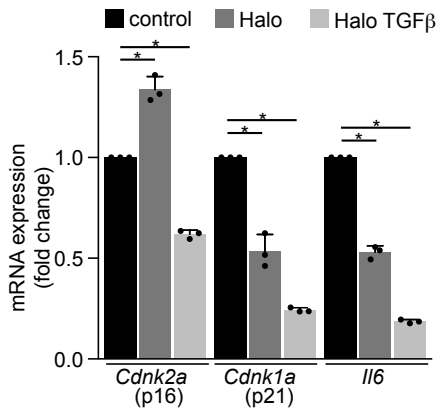

**B**

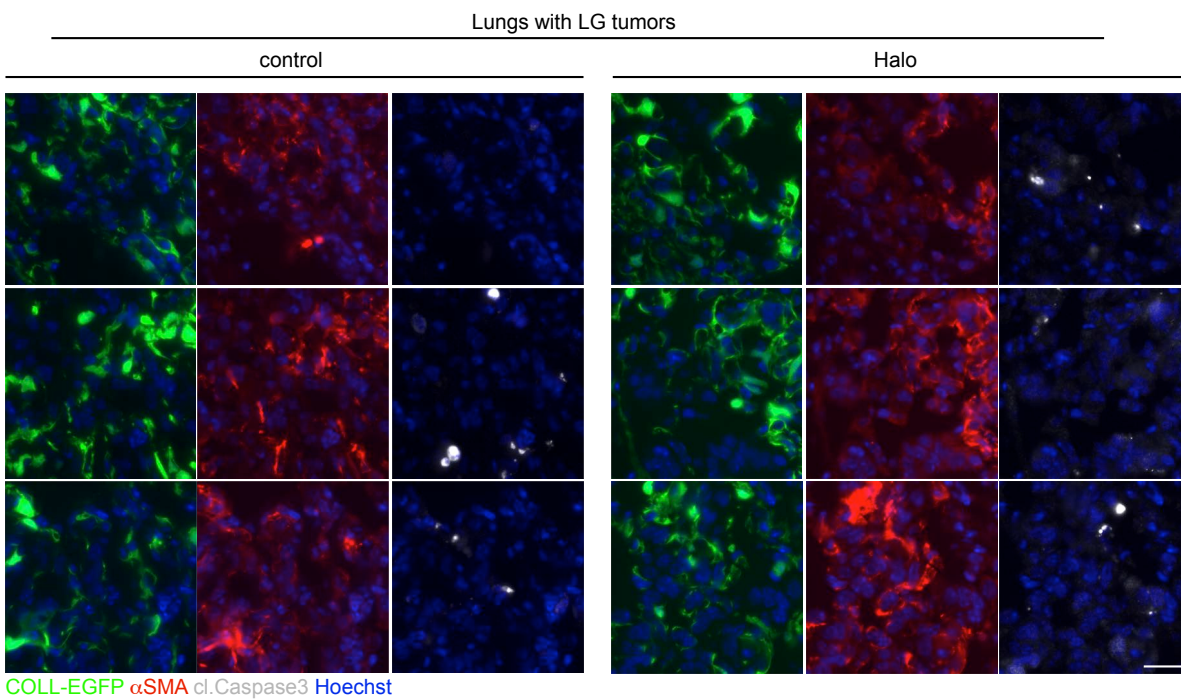

**C**

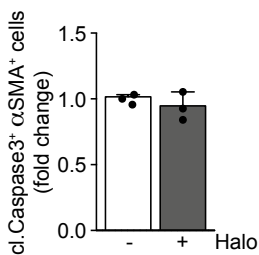

**Supplementary Figure 18. Haloperidol does not increase senescence and apoptosis markers.** (A) Quantification of the mRNA expression of the *Cdkn2a* (p16), *Cdkn1a* (p21) and *Il6* after 3 days of treatment with Haloperidol either alone or in combination with TGF $\beta$ . (n = 3 / gp). (B) Representative images lung cancer sections of COLL-EGFP mice (fibroblasts in green), stained with anti-cleaved Caspase3 (white) and  $\alpha$ SMA (red) antibodies, upon treatment with either PBS (control) or Haloperidol (Halo). Scale bar, 50  $\mu$ m (C) Quantification of the number of fibroblasts positive for both cleaved Caspase 3 and  $\alpha$ SMA (n=3 / gp). Values in A and C are mean  $\pm$  SD. \*P<0.05 by unpaired t-test.



**Supplementary Table 1. Results of the high-throughput screening of FDA-approved compounds able to control fibroblast to myofibroblast differentiation.** The table shows the name of each compound with its Chemical Abstracts Service (CAS) number, the total number of cells in the repeat 1 (R1) and 2 (R2), the average  $\alpha$ SMA intensity and the corresponding z-score.

| Compound                                  | Total Cells R1 field | Total Cells R2 field | Average alpha SMA Cell mean intensity | Zscore Average alpha SMA Cell mean intensity |
|-------------------------------------------|----------------------|----------------------|---------------------------------------|----------------------------------------------|
| 50-02-2 - Dexamethasone                   | 286                  | 296                  | 217.731                               | -2.31640936                                  |
| 52-86-8 - Haloperidol HCl                 | 361                  | 361                  | 221.945                               | -2.22634743                                  |
| 302-79-4 - Retinoic acid                  | 399                  | 412                  | 224.724625                            | -2.166941072                                 |
| 314-19-2 - Apomorphine r (-)              | 354                  | 284                  | 225.4895                              | -2.150594105                                 |
| 10596-23-3 - Clodronate disodium          | 398                  | 400                  | 232.94775                             | -1.991195816                                 |
| 78213-63-5 - Pirobedil HCl                | 348                  | 357                  | 235.47975                             | -1.937081718                                 |
| 53-03-2 - Prednisone                      | 368                  | 300                  | 236.620125                            | -1.912709536                                 |
| 73573-88-3 - Mevastatin                   | 292                  | 281                  | 238.139875                            | -1.880229323                                 |
| 79902-63-9 - Simvastatin                  | 247                  | 220                  | 241.0275                              | -1.818514781                                 |
| 78919-13-8 - Iloprost                     | 314                  | 292                  | 248.852125                            | -1.651286297                                 |
| 64211-46-7 - Oxiconazole nitrate          | 400                  | 349                  | 249.030125                            | -1.647482068                                 |
| 57-83-0 - Progesterone                    | 370                  | 378                  | 250.527875                            | -1.61547204                                  |
| 41294-56-8 - Alfacalcidol                 | 345                  | 372                  | 250.929375                            | -1.606891151                                 |
| 514-78-3 - Canthaxanthin                  | 463                  | 423                  | 252.22175                             | -1.579270414                                 |
| 66085-59-4 - Nimodipine                   | 342                  | 359                  | 253.129125                            | -1.559877926                                 |
| 25122-46-7 - Clobetasol propionate        | 295                  | 250                  | 254.634                               | -1.527715623                                 |
| 22204-24-6 - Pyrantel pamoate             | 332                  | 402                  | 257.5285                              | -1.465854147                                 |
| 22260-51-1 - Bromocriptine mesylate       | 418                  | 398                  | 259.2795                              | -1.428431641                                 |
| 123948-87-8 - Topotecan                   | 227                  | 247                  | 259.705875                            | -1.419319122                                 |
| 154598-52-4 - Efavirenz                   | 364                  | 373                  | 260.6285                              | -1.39960071                                  |
| 124-94-7 - Triamcinolone                  | 276                  | 251                  | 260.929625                            | -1.393165044                                 |
| 79855-88-2 - Trequinsin                   | 353                  | 386                  | 261.11525                             | -1.389197852                                 |
| 31879-05-7 - Fenoprofen                   | 380                  | 410                  | 261.177125                            | -1.387875455                                 |
| 58-32-2 - Dipyridamole                    | 320                  | 334                  | 261.873625                            | -1.372989804                                 |
| 67227-56-9 - Fenoldopam mesylate          | 364                  | 341                  | 262.475625                            | -1.360123814                                 |
| 55528-07-9 - Butaclamol (+)               | 431                  | 392                  | 262.609625                            | -1.357259955                                 |
| 2114454 - Camptothecin                    | 249                  | 226                  | 262.90325                             | -1.350984579                                 |
| 50-22-6 - Corticosterone                  | 300                  | 221                  | 262.91775                             | -1.350674684                                 |
| 75330-75-5 - Lovastatin                   | 241                  | 230                  | 263.201625                            | -1.344607686                                 |
| 61477-96-1 - Piperacillin                 | 394                  | 355                  | 263.900125                            | -1.329679291                                 |
| 6980-18-3 - Kasugamycin                   | 381                  | 297                  | 264.460875                            | -1.317694899                                 |
| 11018-89-6 - Ouabain                      | 503                  | 483                  | 265.181125                            | -1.302301661                                 |
| 28822-58-4 - Isobutylmethylxanthine       | 492                  | 496                  | 265.53975                             | -1.2946371                                   |
| 17230-88-5 - Danazol                      | 411                  | 261                  | 265.725625                            | -1.290664565                                 |
| 82586-55-8 - Quinapril HCl                | 503                  | 440                  | 268.3335                              | -1.234928861                                 |
| 50-03-3 - Hydrocortisone 21-acetate       | 285                  | 243                  | 268.623875                            | -1.228722945                                 |
| 59052-16-3 - Nalbuphine HCl               | 474                  | 451                  | 268.65725                             | -1.228009651                                 |
| 24730-10-7 - Dihydroergocristine mesylate | 362                  | 393                  | 269.65375                             | -1.206712377                                 |
| 120092-68-4 - Manidipine                  | 428                  | 465                  | 269.901                               | -1.201428131                                 |
| 50-24-8 - Prednisolone                    | 321                  | 289                  | 270.21475                             | -1.194722642                                 |
| 153559-49-0 - Bexarotene                  | 447                  | 465                  | 270.383875                            | -1.19110809                                  |

|                                         |     |     |            |              |
|-----------------------------------------|-----|-----|------------|--------------|
| 54527-84-3 - Nicardipine                | 451 | 347 | 270.503375 | -1.188554127 |
| 63659-19-8 - Betaxolol HCl              | 450 | 397 | 270.9055   | -1.179959881 |
| 78613-35-1 - Amorolfine                 | 483 | 540 | 271.983125 | -1.156928797 |
| 19356-17-3 - Calcifediol                | 255 | 295 | 272.087375 | -1.154700758 |
| 57149-07-2 - Naftopidil 2HCl            | 360 | 348 | 273.41325  | -1.126364056 |
| 19453 - Galanthamine HBr                | 499 | 403 | 273.718375 | -1.119842901 |
| 49745-95-1 - Dobutamine HCl             | 397 | 352 | 274.05225  | -1.112707299 |
| 62929-91-3 - Procaterol hcl             | 408 | 440 | 274.128875 | -1.111069664 |
| 1400-61-9 - Nystatin                    | 406 | 349 | 274.70175  | -1.098826135 |
| 10118-90-8 - Minocycline HCl            | 408 | 310 | 274.747625 | -1.097845691 |
| 101975-10-4 - Zardaverine               | 545 | 487 | 274.9085   | -1.094407459 |
| 49562-28-9 - Fenofibrate                | 389 | 361 | 277.330625 | -1.042641618 |
| 110871-86-8 - Sparfloxacin              | 381 | 398 | 277.60125  | -1.0368578   |
| 38776-75-9 - Rifampicin                 | 492 | 464 | 278.30225  | -1.021875974 |
| 2919-66-6 - Melengestrol acetate        | 277 | 258 | 278.42725  | -1.019204464 |
| 60-56-0 - Methimazole                   | 393 | 341 | 278.649125 | -1.014462535 |
| 183321-74-6 - Erlotinib                 | 333 | 291 | 278.666    | -1.014101881 |
| 33419-42-0 - Etoposide                  | 244 | 248 | 279.456375 | -0.997209926 |
| 107753-78-6 - Zafirlukast               | 443 | 427 | 279.608875 | -0.993950685 |
| 51-83-2 - Carbamylcholine Cl            | 474 | 442 | 279.70975  | -0.991794776 |
| 136310-93-5 - Tiotropium Br             | 345 | 373 | 279.760125 | -0.990718158 |
| 34911-55-2 - Amfebutamone               | 441 | 391 | 280.20875  | -0.98113011  |
| 568-72-9 - Tanshinone iia               | 487 | 466 | 282.4285   | -0.933689444 |
| 58186-27-9 - Idebenone                  | 341 | 298 | 282.69025  | -0.928095303 |
| 85760-74-3 - Quinpirole HCl (-)-        | 423 | 419 | 282.850375 | -0.924673099 |
| 115256-11-6 - Dofetilide                | 492 | 416 | 282.91875  | -0.923211783 |
| 54350-48-0 - Etretnate                  | 387 | 348 | 283.302625 | -0.915007577 |
| 106017-08-7 - Rufloxacin                | 337 | 344 | 283.699625 | -0.906522863 |
| 835-31-4 - Naphazoline HCl              | 345 | 277 | 284.090125 | -0.898177067 |
| 79547-78-7 - Levocabastine HCl          | 397 | 378 | 284.2375   | -0.895027357 |
| 38304-91-5 - Minoxidil                  | 469 | 450 | 284.25275  | -0.894701433 |
| 134308-13-7 - Tolcapone                 | 372 | 404 | 284.393375 | -0.891695985 |
| 39562-70-4 - Nitrendipine               | 423 | 398 | 284.594625 | -0.887394854 |
| 130636-43-0 - Nifekalant HCl            | 367 | 318 | 285.11025  | -0.876374878 |
| 50-07-7 - Mitomycin c                   | 265 | 278 | 285.157375 | -0.875367718 |
| 530-78-9 - Flufenamic acid              | 427 | 369 | 285.181    | -0.874862803 |
| 53164-05-9 - Acemetacin                 | 383 | 298 | 285.201875 | -0.874416661 |
| 54-85-3 - Isoniazid                     | 448 | 442 | 286.275625 | -0.851468394 |
| 33386-08-2 - Buspirone HCl              | 357 | 356 | 286.29375  | -0.851081025 |
| 19216-56-9 - Prazosin HCl               | 319 | 321 | 286.30325  | -0.85087799  |
| 60-31-1 - Acetylcholine Cl              | 401 | 348 | 286.34375  | -0.850012421 |
| 379-79-3 - Ergotamine D-tartrate        | 302 | 328 | 286.353625 | -0.849801372 |
| 51022-77-6 - Etazolate                  | 360 | 412 | 286.509875 | -0.846461985 |
| 98319-26-7 - Finasteride                | 350 | 297 | 286.89375  | -0.838257779 |
| 14611-51-9 - Selegiline                 | 432 | 417 | 287.192    | -0.831883557 |
| 11032-41-0 - Dihydroergotamine mesylate | 329 | 350 | 287.24925  | -0.830660006 |
| 6090-95-5 - Conduritol b epoxide        | 381 | 388 | 287.642375 | -0.822258108 |

|                                          |     |     |            |              |
|------------------------------------------|-----|-----|------------|--------------|
| 50-23-7 - Hydrocortisone                 | 336 | 256 | 287.664375 | -0.821787923 |
| 99300-78-4 - Venlafaxine HCl             | 479 | 413 | 287.72525  | -0.820486898 |
| 39809-25-1 - Penciclovir                 | 400 | 378 | 287.795375 | -0.818988181 |
| 614-39-1 - Procainamide                  | 464 | 432 | 287.913125 | -0.816471619 |
| 75847-73-3 - Enalapril                   | 460 | 414 | 287.948375 | -0.815718253 |
| 132203-70-4 - Cilnidipine                | 516 | 430 | 288.208125 | -0.810166856 |
| 22254-24-6 - Ipratropium Br              | 499 | 432 | 288.3055   | -0.80808575  |
| 82640-04-8 - Raloxifene HCl              | 308 | 266 | 288.536125 | -0.803156815 |
| 82419-36-1 - Ofloxacin                   | 452 | 378 | 288.6125   | -0.801524523 |
| 85371-64-8 - Pinacidil                   | 430 | 352 | 289.059    | -0.791981891 |
| 32222-06-3 - Calcitriol                  | 438 | 396 | 289.106125 | -0.790974732 |
| 103177-37-3 - Pranlukast                 | 432 | 429 | 289.585125 | -0.780737507 |
| 6108-05-0 - Lidocaine                    | 441 | 423 | 289.707625 | -0.778119428 |
| 26807-65-8 - Indapamide                  | 354 | 366 | 289.73025  | -0.777635884 |
| 86386-73-4 - Fluconazole                 | 449 | 456 | 289.816875 | -0.775784528 |
| 99592-32-2 - Sertaconazole               | 343 | 397 | 290.03725  | -0.771074657 |
| 17360-35-9 - Oxotremorine sesquifumarate | 514 | 451 | 290.81275  | -0.754500612 |
| 133-67-5 - Trichloromethiazide           | 374 | 340 | 291.01575  | -0.75016208  |
| 53885-35-1 - Ticlopidine HCl             | 410 | 429 | 291.34675  | -0.743087923 |
| 36330-85-5 - Fenbufen                    | 358 | 317 | 291.36475  | -0.742703225 |
| 18046-21-4 - Fentiazac                   | 437 | 477 | 291.459375 | -0.740680893 |
| 42924-53-8 - Nabumetone                  | 316 | 320 | 291.779125 | -0.733847171 |
| 7232-21-5 - Metoclopramide HCl           | 436 | 394 | 291.9875   | -0.729393765 |
| 3160-91-6 - Moroxydine HCl               | 524 | 413 | 292.051    | -0.728036638 |
| 81110-73-8 - Racecadotril                | 478 | 428 | 292.404625 | -0.720478937 |
| 6673-35-4 - Practolol                    | 463 | 502 | 292.69625  | -0.714246306 |
| 826-39-1 - Mecamylamine HCl              | 415 | 298 | 293.007375 | -0.707596918 |
| 23672-07-3 - Sulpiride s (-)             | 519 | 459 | 293.1335   | -0.704901365 |
| 73-31-4 - Melatonin                      | 488 | 430 | 293.5135   | -0.696779976 |
| 110429-49-8 - Paroxetine HCl             | 237 | 245 | 293.5395   | -0.696224302 |
| NA - Pravastatin lactone                 | 366 | 302 | 293.734375 | -0.692059419 |
| 4205-91-8 - Clonidine HCl                | 461 | 400 | 293.93175  | -0.687841105 |
| 56-75-7 - Chloramphenicol                | 435 | 431 | 294.156625 | -0.683035059 |
| 127045-41-4 - Pazufloxacin               | 432 | 453 | 294.678625 | -0.671878836 |
| 71-82-9 - Levallorphan tartrate          | 327 | 335 | 294.747375 | -0.670409505 |
| 98-92-0 - Medroxyprogesterone 17-acetate | 475 | 416 | 294.909375 | -0.666947229 |
| 84225-95-6 - Raclopride l-tartrate s(-)  | 479 | 460 | 295.30375  | -0.658518616 |
| 68-96-2 - 17- hydroxyprogesterone        | 351 | 381 | 295.469125 | -0.654984209 |
| 158966-92-8 - Montelukast                | 430 | 387 | 295.55875  | -0.653068737 |
| 25812-30-0 - Gemfibrozil                 | 412 | 460 | 296.13175  | -0.640822537 |
| 64-77-7 - Tolbutamide                    | 374 | 379 | 296.249    | -0.638316661 |
| 145-13-1 - Pregnenolone                  | 369 | 480 | 296.505125 | -0.632842738 |
| 149-64-4 - Scopolamine n-butylbromide    | 393 | 392 | 296.56875  | -0.631482939 |
| 65-49-6 - 4-aminosalicylic acid          | 417 | 423 | 296.580875 | -0.631223803 |
| 305-03-3 - Chlorambucil                  | 313 | 334 | 296.581625 | -0.631207774 |
| 88671-89-0 - Myclobutanil                | 444 | 362 | 296.68175  | -0.629067895 |
| 93106-60-6 - Enrofloxacin                | 405 | 386 | 296.8825   | -0.624777451 |

|                                     |     |     |            |              |
|-------------------------------------|-----|-----|------------|--------------|
| 130-61-0 - Thioridazine HCl         | 295 | 322 | 296.970375 | -0.622899379 |
| 68550-75-4 - Cilostamide            | 479 | 395 | 296.99925  | -0.622282261 |
| 71125-38-7 - Meloxicam              | 414 | 348 | 297.128375 | -0.619522591 |
| 73-05-2 - PhentolamineHCl           | 534 | 376 | 297.221625 | -0.617529645 |
| 63-92-3 - Phenoxybenzamine HCl      | 465 | 415 | 297.340125 | -0.614997054 |
| 114-80-7 - Neostigmine Br           | 379 | 281 | 297.468375 | -0.612256085 |
| 363-24-6 - Dinoprostone             | 328 | 286 | 297.536625 | -0.610797441 |
| 404-86-4 - Capsaicin                | 319 | 381 | 297.62025  | -0.609010201 |
| 551-11-1 - Dinoprost                | 483 | 449 | 297.72725  | -0.606723389 |
| 23210-56-2 - Ifenprodil             | 430 | 449 | 297.818375 | -0.604775858 |
| 91296-87-6 - Sarafloxacin HCl       | 399 | 421 | 297.827875 | -0.604572824 |
| 5051-62-7 - Guanabenz acetate       | 384 | 382 | 298.15525  | -0.59757614  |
| 149676-40-4 - Pefloxacin mesylate   | 451 | 437 | 298.230125 | -0.595975906 |
| 124858-35-1 - Nadifloxacin          | 297 | 307 | 298.36725  | -0.59304526  |
| 54-92-2 - Iproniazid                | 393 | 357 | 298.42925  | -0.591720191 |
| 224785-90-4 - Vardenafil            | 461 | 434 | 298.542    | -0.58931049  |
| 133040-01-4 - Eprosartan            | 225 | 252 | 298.710125 | -0.585717309 |
| 74863-84-6 - Argatroban             | 397 | 463 | 299.245    | -0.57428592  |
| 1684-40-8 - Tacrine HCl             | 417 | 405 | 299.63975  | -0.565849293 |
| 442-51-3 - Harmine                  | 417 | 375 | 299.783625 | -0.562774385 |
| 85721-33-1 - Ciprofloxacin          | 353 | 305 | 300.35475  | -0.550568258 |
| 24729-96-2 - Clindamycin palmitate  | 352 | 365 | 300.6945   | -0.543307095 |
| 119-36-8 - Methyl salicylate        | 453 | 432 | 300.800625 | -0.541038983 |
| 57754-86-6 - Nisoxetine HCl         | 448 | 424 | 300.8965   | -0.538989936 |
| 378-44-9 - Betamethasone            | 465 | 447 | 300.912625 | -0.538645311 |
| 2898-76-2 - Benzamil                | 374 | 301 | 300.96125  | -0.537606094 |
| 2447-57-6 - Sulfadoxine             | 355 | 357 | 300.972625 | -0.537362986 |
| 170729-80-3 - Aprepitant            | 319 | 310 | 301.02     | -0.536350484 |
| 58-33-3 - Promethazine HCl          | 479 | 456 | 301.039625 | -0.535931057 |
| 113806-05-6 - Olopatadine           | 513 | 468 | 301.092375 | -0.53480368  |
| 111469-81-9 - Naltrindole HCl       | 436 | 425 | 301.14125  | -0.53375912  |
| 113-92-8 - Chlorpheniramine maleate | 331 | 298 | 301.15     | -0.533572114 |
| 1508-75-4 - Tropicamide             | 348 | 348 | 301.165125 | -0.533248862 |
| 90357-06-5 - Bicalutamide           | 380 | 329 | 301.343125 | -0.529444632 |
| 40600-13-3 - Cirazoline HCl         | 419 | 415 | 301.627125 | -0.523374962 |
| 4394-00-7 - Niflumic acid           | 293 | 293 | 302.08675  | -0.513551822 |
| 50-28-2 - Estradiol                 | 456 | 375 | 302.168625 | -0.511801983 |
| 112965-21-6 - Calcipotriene         | 479 | 415 | 302.235    | -0.510383411 |
| 2216-88-5 - Ketoprofen (s)          | 305 | 334 | 302.306    | -0.508865994 |
| 54239-37-1 - Cimaterol              | 472 | 408 | 302.481    | -0.50512588  |
| 20537-88-6 - Amifostine             | 477 | 364 | 302.521    | -0.504270997 |
| 114-49-8 - Scopolamine HBr          | 362 | 391 | 302.522    | -0.504249625 |
| 18683-91-5 - Ambroxol               | 401 | 389 | 302.773875 | -0.498866534 |
| 68291-97-4 - Zonisamide             | 264 | 300 | 302.926625 | -0.495601949 |
| 90-69-7 - Lobeline                  | 425 | 440 | 302.972    | -0.494632191 |
| 125494-59-9 - Sibutramine HCl       | 408 | 366 | 303.017125 | -0.493667776 |
| 04199-10-4 - Propranolol HCl s(-)   | 344 | 301 | 303.119125 | -0.491487824 |

|                                             |     |     |            |              |
|---------------------------------------------|-----|-----|------------|--------------|
| 16320-04-0 - Gestrinone                     | 516 | 484 | 303.686    | -0.479372528 |
| 196618-13-0 - Oseltamivir                   | 370 | 321 | 303.739625 | -0.478226451 |
| 58066-85-6 - Miltefosine                    | 443 | 462 | 303.84575  | -0.475958339 |
| 53716-50-0 - Oxfendazole                    | 366 | 299 | 303.962125 | -0.473471164 |
| 103890-78-4 - Lacidipine                    | 381 | 428 | 304.148375 | -0.469490614 |
| 21187-98-4 - Gliclazide                     | 472 | 452 | 304.194    | -0.468515514 |
| 82009-34-5 - Cilastatin                     | 464 | 363 | 304.223125 | -0.467893052 |
| 14252-80-3 - Bupivacaine HCl                | 445 | 392 | 304.39475  | -0.464225069 |
| 124832-27-5 - Valaciclovir                  | 376 | 298 | 304.467375 | -0.462672922 |
| 50-40-1 - Norepinephrine-(+)-tartrate l (-) | 336 | 335 | 304.54525  | -0.461008572 |
| 90098-04-7 - Rebamipide                     | 474 | 517 | 304.621875 | -0.459370936 |
| 56296-78-7 - Fluoxetine HCl                 | 314 | 257 | 304.968125 | -0.451970855 |
| 139755-83-2 - Sildenafil                    | 341 | 323 | 304.986625 | -0.451575471 |
| 100643-71-8 - Desloratadine                 | 370 | 343 | 305.0625   | -0.449953865 |
| 129-46-4 - Suramin sodium                   | 446 | 406 | 305.78125  | -0.434592685 |
| 79-83-4 - Pantothenic acid                  | 315 | 204 | 305.8175   | -0.433817947 |
| 65277-42-1 - Ketoconazole                   | 310 | 321 | 305.935125 | -0.431304057 |
| 69-09-0 - Chlorpromazine HCl                | 390 | 366 | 305.9705   | -0.43054802  |
| 50-41-9 - Clomiphene citrate                | 301 | 293 | 306.135125 | -0.427029642 |
| 62893-19-0 - Cefoperazone acid              | 426 | 446 | 306.334375 | -0.422771255 |
| 64490-92-2 - Tolmetin Na                    | 452 | 398 | 306.467875 | -0.419918083 |
| 151615 - Oxymetazoline HCl                  | 505 | 401 | 306.782125 | -0.413201908 |
| 145781-92-6 - Goserelin acetate             | 379 | 337 | 306.829875 | -0.412181391 |
| 74050-98-9 - Ketanserin tartrate            | 348 | 361 | 306.970875 | -0.409167929 |
| 53-86-1 - Indomethacin                      | 359 | 397 | 307.032    | -0.407861561 |
| 3778-73-2 - Ifosfamide                      | 352 | 305 | 307.147875 | -0.405385071 |
| 590-63-6 - Carbamyl-beta-methylcholine Cl   | 502 | 461 | 307.168875 | -0.404936258 |
| 57808-65-8 - Closantel                      | 376 | 279 | 307.767375 | -0.39214507  |
| 1841-19-6 - Fluspirilene                    | 292 | 265 | 307.8335   | -0.390731841 |
| 59804-37-4 - Tenoxicam                      | 236 | 220 | 307.995    | -0.387280251 |
| 65-29-2 - Gallamine triethiodide            | 394 | 361 | 308.178875 | -0.38335046  |
| 112809-51-5 - Letrozole                     | 326 | 369 | 308.288125 | -0.381015561 |
| 29122-68-7 - Atenolol                       | 440 | 370 | 308.38975  | -0.378843624 |
| 32672-69-8 - Mesoridazine besylate          | 295 | 285 | 308.97975  | -0.366234099 |
| 67-73-2 - Fluocinolone acetonide            | 313 | 294 | 309.18175  | -0.361916939 |
| 59122-46-2 - Misoprostol                    | 425 | 410 | 309.191875 | -0.361700547 |
| 54-71-7 - Pilocarpine HCl                   | 508 | 529 | 309.256875 | -0.360311362 |
| 109889-09-0 - Granisetron                   | 252 | 282 | 309.316375 | -0.359039723 |
| 54143-56-5 - Flecainide                     | 472 | 426 | 309.38025  | -0.357674582 |
| 51-30-9 - Isoproterenol HCl (rac)           | 380 | 343 | 309.4395   | -0.356408286 |
| 59-33-6 - Mepyramine maleate                | 356 | 353 | 309.601375 | -0.352948682 |
| 5630-53-5 - Tibolone                        | 350 | 330 | 310.27275  | -0.338600004 |
| 50-12-4 - Mephenytoin                       | 290 | 373 | 310.353625 | -0.336871537 |
| 57076-71-8 - Denbufylline                   | 460 | 437 | 310.415125 | -0.335557154 |
| 3366-95-8 - Secnidazole                     | 396 | 429 | 310.551125 | -0.332650552 |
| 111406-87-2 - Zileuton                      | 465 | 444 | 310.55975  | -0.332466218 |
| 81409-90-7 - Cabergoline                    | 399 | 313 | 310.63275  | -0.330906056 |

|                                    |     |     |            |              |
|------------------------------------|-----|-----|------------|--------------|
| 77883-43-3 - Doxazosin mesylate    | 338 | 373 | 310.69675  | -0.329538243 |
| 212141-54-3 - Vatalanib            | 223 | 205 | 310.729625 | -0.328835636 |
| 147536-97-8 - Bosentan             | 343 | 368 | 311.183    | -0.319146071 |
| 113712-98-4 - Tenatoprazole        | 382 | 211 | 311.240375 | -0.317919848 |
| 82410-32-0 - Ganciclovir           | 508 | 494 | 311.347625 | -0.315627693 |
| 53-43-0 - Dehydroepiandrosterone   | 422 | 377 | 311.75625  | -0.306894528 |
| 119302-91-9 - Rocuronium bromide   | 440 | 376 | 311.77275  | -0.306541889 |
| 123441-03-2 - Rivastigmine         | 428 | 445 | 311.789    | -0.306194593 |
| 68-22-4 - Norethindrone            | 283 | 214 | 311.81425  | -0.305654948 |
| 63-45-6 - Primaquine phosphate     | 304 | 295 | 311.837875 | -0.305150033 |
| 105956-99-8 - Clinafloxacin HCl    | 313 | 299 | 311.89     | -0.304036013 |
| 106266-06-2 - Risperidone          | 384 | 330 | 312.010875 | -0.301452663 |
| 69004-03-1 - Toltrazuril           | 403 | 315 | 312.033875 | -0.300961106 |
| 169590-42-5 - Celecoxib            | 408 | 422 | 312.097625 | -0.299598636 |
| 18378-89-7 - Plicamycin            | 241 | 238 | 312.173    | -0.297987715 |
| 5786-21-0 - Clozapine              | 449 | 367 | 312.213875 | -0.297114132 |
| 40391-99-9 - Pamidronic acid       | 305 | 239 | 312.23025  | -0.296764164 |
| 1421-86-9 - Strychnine HCl         | 505 | 392 | 312.724    | -0.286211701 |
| 15826-37-6 - Disodium cromoglycate | 424 | 371 | 312.873125 | -0.28302459  |
| 2016-88-8 - Amiloride              | 431 | 364 | 313.01025  | -0.280093944 |
| 541-22-0 - Decamethonium 2Br       | 362 | 290 | 313.1585   | -0.276925534 |
| 105816-04-4 - nateglinide          | 443 | 391 | 313.27925  | -0.274344856 |
| 64221-86-9 - Imipenem              | 355 | 315 | 313.617375 | -0.267118423 |
| 57381-26-7 - Irsogladine maleate   | 467 | 457 | 313.67775  | -0.265828083 |
| 82571-53-7 - Ozagrel               | 234 | 278 | 313.73675  | -0.264567131 |
| 72509-76-3 - Felodipine            | 301 | 303 | 314.00775  | -0.258775298 |
| 154-21-2 - Lincomycin              | 400 | 324 | 314.266625 | -0.253242602 |
| 595-33-5 - Megestrol acetate       | 401 | 343 | 314.4635   | -0.249034974 |
| 147221-93-0 - Delavirdine mesylate | 413 | 422 | 314.501875 | -0.248214821 |
| 51-21-8 - 5-fluorouracil           | 375 | 319 | 314.555125 | -0.247076758 |
| 90-05-1 - Guaiacol                 | 432 | 463 | 314.5655   | -0.246855023 |
| 5104-49-4 - Flurbiprofen           | 454 | 456 | 314.649625 | -0.245057097 |
| 74011-58-8 - Enoxacin              | 404 | 382 | 314.694    | -0.244108711 |
| 21829-25-4 - Nifedipine            | 318 | 324 | 314.739625 | -0.24313361  |
| 26921-17-5 - Timolol maleate (s)   | 413 | 435 | 315.011125 | -0.237331091 |
| 16676-29-2 - Naltrexone HCl        | 339 | 398 | 315.134875 | -0.234686297 |
| 112529-15-4 - Pioglitazone         | 391 | 401 | 315.312875 | -0.230882067 |
| 1166-34-3 - Cinanserin             | 362 | 348 | 315.375625 | -0.229540969 |
| 63527-52-6 - Cefotaxime acid       | 434 | 443 | 315.385125 | -0.229337934 |
| 51322-75-9 - Tizanidine HCl        | 393 | 279 | 315.424    | -0.228507095 |
| 51803-78-2 - Nimesulide            | 390 | 346 | 315.4965   | -0.226957619 |
| 21462-39-5 - Clindamycin HCl       | 405 | 338 | 315.868625 | -0.219004535 |
| 357-08-4 - Naloxone HCl            | 442 | 413 | 316.12525  | -0.213519926 |
| 93479-97-1 - Glimepiride           | 385 | 432 | 316.223    | -0.211430806 |
| 60628-96-8 - Bifonazole            | 453 | 450 | 316.4265   | -0.207081588 |
| 53902-12-8 - Tranilast             | 427 | 468 | 316.874625 | -0.197504227 |
| 51022-70-9 - Salbutamol sulfate    | 466 | 465 | 317.52875  | -0.183524217 |



|                                                 |     |     |            |              |
|-------------------------------------------------|-----|-----|------------|--------------|
| 84371-65-3 - Mifepristone                       | 274 | 279 | 317.766375 | -0.178445677 |
| 63968-64-9 - Artemisinin                        | 416 | 396 | 318.048625 | -0.172413409 |
| 60-54-8 - Tetracycline                          | 460 | 352 | 318.16075  | -0.170017065 |
| 78415-72-2 - Milrinone                          | 508 | 436 | 318.177    | -0.169669768 |
| 19728-88-2 - Methiothepin maleate               | 261 | 271 | 318.395    | -0.165010656 |
| 104632-26-0 - Pramipexole                       | 361 | 332 | 318.499125 | -0.162785288 |
| 5536-17-4 - Vidarabine                          | 452 | 443 | 318.812    | -0.1560985   |
| 37762-06-4 - Zaprinast                          | 563 | 445 | 319.04925  | -0.151027975 |
| 51037-30-0 - Acipimox                           | 411 | 396 | 319.105375 | -0.149828467 |
| 88150-42-9 - Amlodipine                         | 514 | 463 | 319.126875 | -0.149368967 |
| 120279-95-0 - Dorzolamide                       | 263 | 304 | 319.164    | -0.148575529 |
| 1405-54-5 - Tylosin tartrate                    | 387 | 366 | 319.43925  | -0.142692865 |
| 99-66-1 - Valproic acid                         | 522 | 483 | 319.715    | -0.136799515 |
| 2068-78-2 - Vincristine sulfate                 | 439 | 434 | 319.7315   | -0.136446876 |
| 148-82-3 - Melphalan                            | 264 | 241 | 319.957125 | -0.131624801 |
| 749-02-0 - Spiperone                            | 451 | 417 | 320.0515   | -0.129607811 |
| 100490-36-6 - Tosufloxacin                      | 322 | 241 | 320.128125 | -0.127970176 |
| 114-70-5 - Sodium phenylacetate                 | 255 | 286 | 320.190125 | -0.126645107 |
| 57-41-0 - Phenytoin                             | 461 | 400 | 320.38475  | -0.122485567 |
| 28721-07-5 - Oxcarbazepine                      | 367 | 336 | 320.726375 | -0.115184331 |
| 57-94-3 - Tubocurarine Cl (+)                   | 485 | 462 | 320.758875 | -0.114489739 |
| 143491-57-0 - Emtricitabine                     | 560 | 511 | 320.83325  | -0.11290019  |
| 6119-47-7 - Quinine                             | 521 | 411 | 320.854    | -0.11245672  |
| 959-24-0 - Sotalol HCl                          | 455 | 479 | 320.86075  | -0.112312458 |
| 36322-90-4 - Piroxicam                          | 422 | 364 | 320.927    | -0.110896558 |
| 60142-96-3 - Gabapentin                         | 540 | 502 | 320.943    | -0.110554605 |
| 78110-38-0 - Aztreonam                          | 491 | 483 | 321.166    | -0.105788632 |
| 102767-28-2 - Levetiracetam                     | 439 | 402 | 321.381125 | -0.101190964 |
| 104227-87-4 - Famciclovir                       | 388 | 409 | 321.417    | -0.100424241 |
| 93793-83-0 - Roxatidine acetate HCl             | 480 | 381 | 321.4405   | -0.099921997 |
| 88495-63-0 - Artesunate                         | 266 | 241 | 321.469125 | -0.099310221 |
| 89197-32-0 - Efaroxan                           | 391 | 267 | 321.506    | -0.098522126 |
| 22494-42-4 - Diflunisal                         | 394 | 351 | 322.102625 | -0.085771011 |
| 3506-09-0 - Propranolol                         | 294 | 352 | 322.2255   | -0.083144917 |
| 50-35-1 - Thalidomide                           | 270 | 245 | 322.274    | -0.082108371 |
| 52549-17-4 - Pranoprofen                        | 450 | 440 | 322.573375 | -0.075710106 |
| 1791337 - Carbadox                              | 460 | 415 | 322.594125 | -0.075266635 |
| 2038-35-9 - Phenamil                            | 519 | 480 | 322.617125 | -0.074775077 |
| 36791-04-5 - Ribavirin                          | 383 | 414 | 322.784875 | -0.071189912 |
| 436349 - Doxifluridine                          | 376 | 256 | 322.825    | -0.070332357 |
| 120511-73-1 - Anastrozole                       | 372 | 411 | 323.018625 | -0.066194189 |
| 52-01-7 - Spironolactone                        | 271 | 298 | 323.159875 | -0.063175383 |
| 62658-64-4 - Bopindolol malonate                | 251 | 244 | 323.512375 | -0.055641726 |
| 97825-25-7 - Ractopamine                        | 366 | 335 | 323.514375 | -0.055598982 |
| 139481-59-7 - Candesartan                       | 301 | 428 | 323.645625 | -0.052793897 |
| 152459-95-5 - Imatinib                          | 229 | 206 | 323.695875 | -0.05171995  |
| 81-24-3 - Taurocholic acid, sodium salt hydrate | 375 | 393 | 323.751625 | -0.050528457 |

|                                      |     |     |            |              |
|--------------------------------------|-----|-----|------------|--------------|
| 7414-83-7 - Etidronate 2Na           | 477 | 351 | 323.88325  | -0.047715357 |
| 74764-40-2 - Bepridil                | 377 | 298 | 323.958125 | -0.046115123 |
| 15500-66-0 - Pancuronium Br          | 414 | 407 | 324.001125 | -0.045196124 |
| 159989-64-7 - Nelfinavir Mesylate    | 309 | 317 | 324.037    | -0.0444294   |
| 112964-99-5 - Hydroxytacrine maleate | 473 | 457 | 324.052875 | -0.044090119 |
| 63675-72-9 - Nisoldipine             | 281 | 283 | 324.1225   | -0.042602088 |
| 72656-09-3 - Carvedilol              | 320 | 293 | 324.2635   | -0.039588625 |
| 80288-49-9 - Furafylline             | 414 | 373 | 324.2665   | -0.039524509 |
| 72432-10-1 - Aniracetam              | 296 | 327 | 324.581    | -0.032802991 |
| 603-50-9 - Bisacodyl                 | 474 | 497 | 324.68875  | -0.03050015  |
| 54-31-9 - Furosemide                 | 454 | 448 | 324.713875 | -0.029963176 |
| 143-67-9 - Vinblastine sulfate       | 484 | 441 | 324.787625 | -0.028386986 |
| 50-91-9 - Floxuridine                | 328 | 304 | 324.81725  | -0.027753838 |
| 6998-60-3 - Rifamycin sv             | 345 | 265 | 325.099875 | -0.021713555 |
| 103745-39-7 - Fasudil                | 435 | 399 | 325.192625 | -0.019731295 |
| 73210-73-8 - Xamoterol hemifumarate  | 479 | 502 | 325.204875 | -0.019469487 |
| 566-48-3 - Formestane                | 335 | 367 | 325.21125  | -0.01933324  |
| 69975-86-6 - Doxofylline             | 458 | 418 | 325.44975  | -0.014235999 |
| 2058-52-8 - Clothiapine              | 421 | 424 | 325.897625 | -0.004663981 |
| 85622-93-1 - Temozolomide            | 409 | 307 | 326.164625 | 0.001042364  |
| 66104-23-2 - Pergolide mesylate      | 429 | 384 | 326.17275  | 0.001216012  |
| 34580-14-8 - Ketotifen fumarate      | 408 | 374 | 326.276375 | 0.003430693  |
| 13710-19-5 - Tolfenamic acid         | 455 | 367 | 327.2605   | 0.024463488  |
| 38194-50-2 - Sulindac                | 489 | 471 | 327.54375  | 0.030517129  |
| 144689-63-4 - Olmesartan             | 448 | 477 | 327.67475  | 0.033316871  |
| 101477-55-8 - Lomerizine HCl         | 304 | 240 | 327.921    | 0.038579745  |
| 50700-72-6 - Vecuronium Br           | 312 | 279 | 328.201875 | 0.044582627  |
| 1951-25-3 - Amiodarone               | 294 | 245 | 328.267    | 0.045974483  |
| 24390-14-5 - Doxycycline HCl         | 442 | 417 | 328.497125 | 0.050892732  |
| 2963-78-2 - Butyrylcholine Cl        | 451 | 445 | 328.561375 | 0.052265888  |
| 83366-66-9 - Nefazodone              | 323 | 324 | 328.651625 | 0.054194718  |
| 103628-48-4 - Sumatriptan Succinate  | 358 | 388 | 328.724875 | 0.055760222  |
| 70458-96-7 - Norfloxacin             | 388 | 389 | 328.76425  | 0.056601748  |
| 1156-19-0 - Tolazamide               | 434 | 490 | 329.0965   | 0.06370262   |
| 135046-48-9 - Clopidogrel sulfate    | 229 | 293 | 329.293    | 0.067902233  |
| 79944-56-2 - Idazoxan                | 383 | 386 | 329.508875 | 0.07251593   |
| 161814-49-9 - Amprenavir             | 369 | 387 | 329.58125  | 0.074062734  |
| 14028-44-5 - Amoxapine               | 496 | 455 | 329.622875 | 0.074952347  |
| 67121-76-0 - Fluperlapine            | 420 | 375 | 329.7885   | 0.078492097  |
| 105462-24-6 - Risedronic acid        | 384 | 286 | 329.81375  | 0.079031742  |
| 7481-89-2 - 2',3' - dideoxycytidine  | 498 | 418 | 330.28975  | 0.089204851  |
| 132-98-9 - Pencillin v potassium     | 409 | 414 | 330.317375 | 0.089795254  |
| 298-46-4 - Carbamazepine             | 372 | 386 | 330.782375 | 0.09973327   |
| 93-14-1 - Guaifenesin                | 421 | 433 | 331.153375 | 0.10766231   |
| 81103-11-9 - Clarithromycin          | 306 | 254 | 331.269125 | 0.110136128  |
| 21736-83-4 - Spectinomycin           | 408 | 329 | 331.597375 | 0.117151512  |
| 100986-85-4 - Levofloxacin HCl       | 289 | 212 | 331.73175  | 0.120023385  |

|                                                    |     |     |            |             |
|----------------------------------------------------|-----|-----|------------|-------------|
| 73220-03-8 - Remoxipride                           | 458 | 477 | 331.866875 | 0.122911287 |
| 364-98-7 - Diazoxide                               | 502 | 454 | 332.309625 | 0.132373774 |
| 146-48-5 - Yohimbine HCl                           | 427 | 406 | 332.360875 | 0.133469092 |
| 87333-19-5 - Ramipril                              | 443 | 445 | 332.401    | 0.134326647 |
| 636-54-4 - Clopamide                               | 353 | 338 | 332.826    | 0.14340978  |
| 113-52-0 - Imipramine HCl                          | 412 | 388 | 332.952625 | 0.146116019 |
| 29094-61-9 - Glipizide                             | 349 | 321 | 333.002625 | 0.147184623 |
| 54029-12-8 - Ricobendazole                         | 444 | 431 | 333.032875 | 0.147831128 |
| 146-56-5 - Fluphenazine 2HCl                       | 281 | 271 | 333.1015   | 0.149297787 |
| 54-42-2 - Idoxuridine                              | 234 | 225 | 333.148125 | 0.15029426  |
| 80809-81-0 - Docebenone                            | 246 | 283 | 333.294125 | 0.153414583 |
| 80214-83-1 - Roxithromycin                         | 439 | 399 | 333.35425  | 0.154699579 |
| 7177-48-2 - Ampicillin trihydrate                  | 462 | 483 | 333.3785   | 0.155217852 |
| 28797-61-7 - Pirenzepine 2HCl                      | 342 | 393 | 333.43825  | 0.156494833 |
| 72558-82-8 - Ceftazidime                           | 411 | 447 | 333.813375 | 0.164512034 |
| 10347-81-6 - Maprotiline HCl                       | 384 | 313 | 333.84875  | 0.165268071 |
| 202409-33-4 - Etoricoxib                           | 386 | 335 | 334.460125 | 0.178334424 |
| 147-24-0 - Diphenhydramine HCl                     | 523 | 443 | 335.2495   | 0.195205007 |
| 79660-72-3 - Fleroxacin                            | 476 | 416 | 335.885    | 0.208786961 |
| 129722-12-9 - Aripiprazole                         | 354 | 379 | 336.01225  | 0.211506558 |
| 13523-86-9 - Pindolol                              | 427 | 387 | 336.327375 | 0.218241434 |
| 59277-89-3 - Acycloguanosine                       | 436 | 370 | 336.344625 | 0.218610102 |
| 37148-27-9 - Clenbuterol                           | 430 | 438 | 336.4175   | 0.220167592 |
| 184475-35-2 - Gefitinib                            | 281 | 247 | 336.457875 | 0.22103049  |
| 532-11-6 - Anethole-trithione<br>(anetholtrithion) | 316 | 335 | 336.5175   | 0.2223048   |
| 115956-12-2 - Dolasetron                           | 281 | 351 | 336.578625 | 0.223611168 |
| 1054-88-2 - Spiroxitrine                           | 423 | 431 | 336.657625 | 0.225299562 |
| 28395-03-1 - Bumetanide                            | 360 | 382 | 336.73825  | 0.227022686 |
| 83150-76-9 - Octreotide                            | 366 | 331 | 336.876625 | 0.229980047 |
| 162011-90-7 - Rofecoxib                            | 411 | 358 | 337.0855   | 0.234444139 |
| 84057-84-1 - Lamotrigine                           | 360 | 423 | 337.104875 | 0.234858223 |
| 111974-72-2 - Quetiapine fumarate                  | 444 | 380 | 337.29225  | 0.238862816 |
| 62571-86-2 - Captopril                             | 256 | 240 | 337.416625 | 0.241520968 |
| 443-48-1 - Metronidazole                           | 366 | 338 | 337.47175  | 0.242699104 |
| 23313-68-0 - Verapamil                             | 422 | 386 | 337.502625 | 0.243358967 |
| 51-40-1 - Epinephrine-(+)-tartrate I (-)           | 417 | 430 | 337.73275  | 0.248277216 |
| 13707-88-5 - Alprenolol HCl                        | 472 | 377 | 337.8765   | 0.251349452 |
| 27203-92-5 - Tramadol HCl                          | 392 | 355 | 338.085625 | 0.255818887 |
| 361-37-5 - Methysergide                            | 297 | 314 | 338.14875  | 0.257167999 |
| 68373-14-8 - Sulbactam                             | 431 | 388 | 338.293125 | 0.260253593 |
| 1405-10-3 - Neomycin sulfate                       | 301 | 303 | 338.58525  | 0.266496911 |
| 41859-67-0 - Bezafibrate                           | 535 | 522 | 338.80475  | 0.271188082 |
| 555-30-6 - Methyl dopa                             | 394 | 345 | 338.936625 | 0.274006524 |
| 517- 89- 5 - Shikonin                              | 436 | 422 | 338.96425  | 0.274596928 |
| 56392-17-7 - Metoprolol tartrate                   | 369 | 284 | 339.09     | 0.277284466 |
| 66357-59-3 - Ranitidine HCl                        | 492 | 446 | 339.122    | 0.277968373 |
| 13311-84-7 - Flutamide                             | 524 | 431 | 339.761875 | 0.29164383  |

|                                          |     |     |            |             |
|------------------------------------------|-----|-----|------------|-------------|
| 54965-24-1 - Tamoxifen citrate           | 267 | 247 | 339.923375 | 0.295095421 |
| 59865-13-3 - Cyclosporin a               | 406 | 313 | 340.049125 | 0.297782959 |
| 891986 - Dacarbazine                     | 303 | 207 | 340.054875 | 0.297905849 |
| 2078-54-8 - Propofol                     | 293 | 333 | 340.12025  | 0.299303048 |
| 1677687 - Pentoxifylline                 | 438 | 361 | 340.27375  | 0.302583662 |
| 14222-60-7 - Prothionamide               | 429 | 436 | 340.323125 | 0.303638908 |
| 30516-87-1 - 3'-azido-3'-deoxythymidine  | 459 | 436 | 340.4865   | 0.307130571 |
| 315-30-0 - Allopurinol                   | 476 | 428 | 340.91     | 0.316181646 |
| 745-65-3 - Alprostadiol                  | 386 | 399 | 341.008375 | 0.318284124 |
| 65141-46-0 - Nicorandil                  | 454 | 401 | 341.16375  | 0.32160481  |
| 51-02-5 - Pronethalol HCl                | 479 | 469 | 341.380375 | 0.326234536 |
| 50-27-1 - Estriol                        | 418 | 375 | 341.380625 | 0.326239879 |
| 7240-38-2 - Oxacillin sodium monohydrate | 409 | 360 | 341.4      | 0.326653963 |
| 70288-86-7 - Ivermectin                  | 400 | 417 | 341.62225  | 0.331403907 |
| 306-40-1 - Succinylcholine               | 260 | 249 | 342.305625 | 0.34600905  |
| 59-92-7 - Levodopa                       | 332 | 272 | 342.401875 | 0.348066112 |
| 611-75-6 - Bromhexine HCl                | 472 | 452 | 342.510375 | 0.350384982 |
| 84625-61-6 - Itraconazole                | 350 | 360 | 343.25975  | 0.366400682 |
| 73590-58-6 - Omeprazole                  | 337 | 333 | 343.869    | 0.37942162  |
| 57773-63-4 - Triptorelin                 | 395 | 280 | 344.218375 | 0.386888489 |
| 98079-52-8 - Lomefloxacin HCl            | 288 | 256 | 344.313375 | 0.388918836 |
| 129453-61-8 - Fulvestrant                | 267 | 295 | 344.487    | 0.392629563 |
| 92623-83-1 - Pravastatin                 | 448 | 401 | 344.843    | 0.400238022 |
| 1405-41-0 - Gentamycin sulfate           | 489 | 452 | 345.300375 | 0.410013076 |
| 57808-66-9 - Domperidone                 | 392 | 368 | 346.41075  | 0.433744095 |
| 71751-41-2 - Abamectin                   | 363 | 363 | 346.840125 | 0.44292073  |
| 581-88-4 - Debrisoquin sulfate           | 274 | 270 | 347.246375 | 0.451603137 |
| 81732-65-2 - Bambuterol                  | 449 | 451 | 347.463125 | 0.456235534 |
| 10418-03-8 - Stanozolol                  | 318 | 301 | 347.688    | 0.46104158  |
| 315-80-0 - Dibenzepine HCl               | 440 | 422 | 347.713375 | 0.461583896 |
| 13010-47-4 - Lomustine                   | 307 | 295 | 347.721125 | 0.46174953  |
| 102625-70-7 - Pantoprazole               | 429 | 374 | 347.966875 | 0.467001718 |
| 427-51-0 - Cyproterone acetate           | 297 | 283 | 348.055375 | 0.468893146 |
| 637-07-0 - Clofibrate                    | 324 | 296 | 348.1935   | 0.471845164 |
| 53-16-7 - Estrone                        | 395 | 323 | 348.2645   | 0.473362582 |
| 111555-58-9 - Naltriben mesylate         | 412 | 438 | 348.411625 | 0.476506949 |
| 69655-05-6 - Didanosine                  | 361 | 442 | 348.436625 | 0.477041251 |
| 121268-17-5 - Alendronate                | 401 | 342 | 348.955875 | 0.488138701 |
| 64795-35-3 - Mesulergine HCl             | 424 | 438 | 349.08325  | 0.490860969 |
| 64228-81-5 - Atracurium besylate         | 356 | 337 | 349.112375 | 0.491483431 |
| 645-05-6 - Altretamine                   | 447 | 397 | 349.345    | 0.49645511  |
| 440-17-5 - Trifluoperazine               | 320 | 286 | 350.03975  | 0.511303361 |
| 144701-48-4 - Telmisartan                | 288 | 293 | 350.406875 | 0.519149584 |
| 58-54-8 - Ethacrynic acid                | 320 | 379 | 350.41025  | 0.519221715 |
| 3521-84-4 - Meglumine                    | 475 | 372 | 350.572    | 0.522678648 |
| 63590-64-7 - Terazosin HCl               | 270 | 300 | 350.596    | 0.523191578 |
| 95635-56-6 - Ranolazine 2HCl             | 472 | 447 | 350.6745   | 0.524869286 |

|                                       |     |     |            |             |
|---------------------------------------|-----|-----|------------|-------------|
| 78755-81-4 - Flumazenil               | 267 | 257 | 351.43125  | 0.541042605 |
| 76824-35-6 - Famotidine               | 514 | 475 | 351.432625 | 0.541071992 |
| 130929-57-6 - Entacapone              | 257 | 349 | 352.241875 | 0.558367344 |
| 115344-47-3 - Siguazodan              | 481 | 395 | 352.575375 | 0.565494932 |
| 2971-90-6 - Clopidol                  | 253 | 283 | 352.82175  | 0.570760477 |
| 105826-92-4 - Tropisetron HCl         | 417 | 363 | 352.82425  | 0.570813908 |
| 130209-82-4 - Latanoprost             | 409 | 390 | 352.845    | 0.571257378 |
| 96036-03-2 - Meropenem                | 362 | 337 | 352.891    | 0.572240494 |
| 50847-11-5 - Ibudilast                | 364 | 212 | 353.192375 | 0.578681503 |
| 1986-47-6 - Tranylcypromine           | 455 | 322 | 353.235875 | 0.579611188 |
| 21535-47-7 - Mianserin hcl            | 359 | 286 | 353.353375 | 0.582122407 |
| 99464-64-9 - Ampiroxicam              | 428 | 421 | 353.470625 | 0.584628283 |
| 60-81-1 - Phloridzin                  | 287 | 208 | 353.6885   | 0.589284725 |
| 6138-79-0 - Trans-triprolidine HCl    | 432 | 421 | 353.753625 | 0.590676581 |
| 14838-15-4 - Phenylpropanolamine      | 326 | 254 | 354.107    | 0.598228939 |
| 64-47-1 - Physostigmine sulfate       | 388 | 374 | 354.11625  | 0.598426663 |
| 122892-31-3 - Itopride HCl            | 370 | 381 | 354.5345   | 0.607365501 |
| 55268-74-1 - Praziquantel             | 403 | 376 | 354.6915   | 0.610720917 |
| 322-35-0 - Benserazide HCl            | 367 | 325 | 355.19575  | 0.621497787 |
| 388082-78-8 - Lapatinib               | 300 | 283 | 355.929625 | 0.637182219 |
| 366-70-1 - Procarbazine HCl           | 517 | 406 | 356.185625 | 0.642653471 |
| 1649-18-9 - Azaperone                 | 550 | 454 | 356.202625 | 0.643016796 |
| 3810-74-0 - Streptomycin sulfate      | 329 | 306 | 356.31775  | 0.645477257 |
| 81147-92-4 - Esmolol                  | 287 | 263 | 357.423625 | 0.669112102 |
| 50-33-9 - Phenylbutazone              | 452 | 404 | 358.684875 | 0.696067633 |
| 54063-53-5 - Propafenone              | 485 | 473 | 358.7725   | 0.697940361 |
| 657-24-9 - Metformin                  | 427 | 329 | 358.950125 | 0.701736576 |
| 119141-88-7 - Esomeprazole potassium  | 418 | 401 | 359.064125 | 0.704172993 |
| 15687-27-1 - Ibuprofen                | 298 | 251 | 359.54475  | 0.714444947 |
| 95734-82-0 - Nedaplatin               | 303 | 320 | 359.916625 | 0.722392688 |
| 54187-04-1 - Rilmenidine hemifumarate | 411 | 431 | 360.020625 | 0.724615384 |
| 34552-83-5 - Loperamide               | 262 | 251 | 360.07625  | 0.725804206 |
| 51-12-7 - Nialamide                   | 341 | 352 | 360.1895   | 0.728224594 |
| 91161-71-6 - Terbinafine HCl          | 412 | 292 | 360.436375 | 0.733500825 |
| 15307-79-6 - Diclofenac,Na            | 375 | 362 | 360.953375 | 0.744550189 |
| 73231-34-2 - Florfenicol              | 416 | 371 | 361.034875 | 0.746292013 |
| 7361-61-7 - Xylazine HCl              | 414 | 432 | 361.152875 | 0.748813918 |
| 165800-03-3 - Linezolid               | 533 | 464 | 361.491625 | 0.756053709 |
| 128196-01-0 - Escitalopram            | 278 | 290 | 362.43     | 0.776108731 |
| 1716-12-7 - Sodium phenylbutyrate     | 367 | 288 | 362.632125 | 0.780428562 |
| 88040-23-7 - Cefepime                 | 365 | 379 | 362.803375 | 0.78408853  |
| 99614-01-4 - Ondansetron              | 402 | 395 | 363.615875 | 0.801453342 |
| 83905-01-5 - Azithromycin             | 486 | 450 | 363.733875 | 0.803975247 |
| 42971-09-5 - Vinpocetine              | 265 | 368 | 364.19725  | 0.813878533 |
| 25717-80-0 - Molsidomine              | 501 | 482 | 364.74125  | 0.825504943 |
| 41575-94-4 - Carboplatin              | 453 | 479 | 364.94625  | 0.829886218 |
| 19982-08-2 - Memantine HCl            | 334 | 325 | 365.736875 | 0.846783516 |

|                                          |            |         |             |             |
|------------------------------------------|------------|---------|-------------|-------------|
| 28860-95-9 - Carbidopa                   | 351        | 315     | 365.97825   | 0.851942201 |
| 6055-19-2 - Cyclophosphamide monohydrate | 372        | 314     | 366.216875  | 0.857042113 |
| 97322-87-7 - Troglitazone                | 461        | 391     | 366.94925   | 0.872694487 |
| 483-63-6 - Crotamiton                    | 327        | 322     | 366.988625  | 0.873536013 |
| 14976-57-9 - Clemastine fumarate         | 307        | 323     | 367.4565    | 0.883535473 |
| 118072-93-8 - Zoledronic acid            | 335        | 265     | 367.821375  | 0.89133361  |
| 55-48-1 - Atropine sulfate               | 430        | 355     | 367.907625  | 0.893176951 |
| 147416-96-4 - Telenzepine 2HCl           | 411        | 338     | 368.317     | 0.901926145 |
| 37321-09-8 - Apramycin                   | 438        | 413     | 368.718     | 0.910496348 |
| 38083-17-9 - Climbazole                  | 270        | 290     | 368.778625  | 0.91179203  |
| 41570-61-0 - Tulobuterol                 | 360        | 363     | 369.106375  | 0.918796728 |
| 22204-53-1 - Naproxen                    | 309        | 372     | 369.289625  | 0.922713161 |
| 125-84-8 - DL-aminoglutethimide          | 520        | 429     | 369.394375  | 0.924951886 |
| 64224-21-1 - Oltipraz                    | 459        | 411     | 370.474125  | 0.948028385 |
| 124750-99-8 - Losartan potassium         | 235        | 229     | 370.967375  | 0.958570162 |
| 26786-84-5 - Lomofungin                  | 480        | 426     | 371.236     | 0.964311236 |
| 84-16-2 - Hexestrol                      | 375        | 403     | 371.261125  | 0.96484821  |
| 68475-42-3 - Anagrelide                  | 396        | 359     | 371.599875  | 0.972088    |
| 1501-84-4 - Rimantadine HCl              | 408        | 419     | 371.740875  | 0.975101463 |
| 32828-81-2 - Picotamide                  | 405        | 455     | 372.06275   | 0.9819806   |
| 749-13-3 - Trifluoperidol 2HCl           | 257        | 205     | 372.141875  | 0.983671666 |
| 112811-59-3 - Gatifloxacin               | 427        | 459     | 372.52575   | 0.991875872 |
| 56-53-1 - Diethylstilbestrol             | 341        | 346     | 372.6685    | 0.994926736 |
| 122-11-2 - Sulfadimethoxine              | 334        | 340     | 372.778     | 0.997266978 |
| 976-71-6 - Canrenone                     | 428        | 442     | 372.94425   | 1.000820086 |
| CTRL                                     | 364.015625 | 331.375 | 373.1361279 | 1.004920916 |
| 128794-94-5 - Mycophenolate mofetil      | 344        | 292     | 373.49675   | 1.012628158 |
| 35898-87-4 - Dilazep                     | 439        | 426     | 374.182125  | 1.027276045 |
| 1744-22-5 - Riluzole HCl                 | 237        | 268     | 374.624375  | 1.036727846 |
| 302-22-7 - Chlormadinone acetate         | 377        | 405     | 375.12075   | 1.04733641  |
| 434-03-7 - Ethisterone                   | 477        | 474     | 375.379375  | 1.052863763 |
| 16170-76-6 - Bromebric acid              | 445        | 444     | 376.543     | 1.077732846 |
| 35208-55-0 - Clindamycin PO4             | 391        | 373     | 377.035875  | 1.088266608 |
| 60607-34-3 - Oxatomide                   | 461        | 445     | 377.558625  | 1.099438861 |
| 2062-78-4 - Pimozide                     | 246        | 232     | 377.756375  | 1.103665189 |
| 27848-84-6 - Nicergoline                 | 434        | 403     | 377.9525    | 1.107856788 |
| 22071-15-4 - Ketoprofen                  | 345        | 289     | 378.341875  | 1.11617854  |
| 14611-52-0 - Deprenyl HCl r (-)          | 383        | 334     | 378.411625  | 1.117669242 |
| 21498-08-8 - Lofexidine                  | 370        | 313     | 379.29075   | 1.136457969 |
| 317-34-0 - Aminophylline                 | 416        | 290     | 379.390375  | 1.138587162 |
| 61413-54-5 - Rolipram                    | 453        | 425     | 379.9025    | 1.149532337 |
| 497-30-3 - Ergothioneine                 | 479        | 405     | 380.398625  | 1.160135558 |
| 2393-92-2 - Thiamphenicol glycinate      | 465        | 378     | 380.5045    | 1.162398327 |
| 19387-91-8 - Tinidazole                  | 325        | 279     | 382.332375  | 1.201463811 |
| 114084-78-5 - Ibandronate                | 398        | 341     | 382.361     | 1.202075587 |
| 99011-02-6 - Imiquimod                   | 342        | 312     | 383.3785    | 1.223821675 |
| 30484-77-6 - Flunarizine-2HCl            | 346        | 356     | 385.194875  | 1.26264138  |



|                                     |     |     |            |             |
|-------------------------------------|-----|-----|------------|-------------|
| 50-78-2 - Acetylsalicylic acid      | 477 | 376 | 386.758375 | 1.296056621 |
| 10238-21-8 - Glyburide              | 408 | 389 | 387.647375 | 1.315056397 |
| 139264-17-8 - zolmitriptan          | 302 | 270 | 389.07575  | 1.345583737 |
| 123318-82-1 - Clofarabine           | 447 | 430 | 389.263375 | 1.349593673 |
| 95233-18-4 - Atovaquone             | 331 | 354 | 389.377875 | 1.352040776 |
| 72599-27-0 - Miglustat              | 361 | 423 | 389.6425   | 1.357696361 |
| 114977-28-5 - Docetaxil             | 290 | 257 | 390.4715   | 1.375413813 |
| 59729-33-8 - Citalopram             | 341 | 274 | 391.433375 | 1.395971079 |
| 68-26-8 - Vitamin a (acetate)       | 408 | 378 | 392.214875 | 1.412673357 |
| 69014-14-8 - Tiotidine              | 340 | 304 | 394.02675  | 1.451396888 |
| 16595-80-5 - Levamisole HCl         | 311 | 306 | 394.147875 | 1.45398558  |
| 738-70-5 - Trimethoprim             | 367 | 341 | 394.272    | 1.456638389 |
| 106463-17-6 - Tamsulosin HCl        | 316 | 264 | 394.994625 | 1.472082386 |
| 22916-47-8 - Miconazole             | 339 | 310 | 395.113625 | 1.474625663 |
| 76420-72-9 - Enalaprilat            | 390 | 304 | 395.465875 | 1.482153977 |
| 50-63-5 - Chloroquine phosphate     | 357 | 330 | 395.885125 | 1.49111422  |
| 32986-56-4 - Tobramycin (free base) | 311 | 258 | 397.184125 | 1.518876548 |
| 89-57-6 - 5-aminosalicylic acid     | 510 | 488 | 397.710875 | 1.530134289 |
| 68-35-9 - Sulfadiazine              | 321 | 312 | 397.868125 | 1.533495048 |
| 83915-83-7 - Lisinopril             | 262 | 230 | 398.4515   | 1.545962983 |
| 17902-23-7 - Ftorafur               | 527 | 417 | 399.349125 | 1.565147093 |
| 33286-22-5 - Diltiazem              | 465 | 425 | 400.7805   | 1.595738549 |
| 65899-73-2 - Tioconazole            | 335 | 240 | 400.933375 | 1.599005805 |
| 100-33-4 - Pentamidine              | 332 | 350 | 401.817625 | 1.617904064 |
| 311074 - Troleandomycin             | 405 | 299 | 404.48075  | 1.674820575 |
| 132539-06-1 - Olanzapine            | 370 | 377 | 404.6635   | 1.678726322 |
| 51481-61-9 - Cimetidine             | 416 | 379 | 405.116375 | 1.688405201 |
| 61-68-7 - Mefenamic acid            | 265 | 215 | 413.431625 | 1.86611936  |
| 101828-21-1 - Butenafine            | 287 | 306 | 418.920125 | 1.983420001 |
| 79794-75-5 - Loratadine             | 232 | 220 | 429.030375 | 2.199497037 |
| 89796-99-6 - Aceclofenac            | 400 | 358 | 433.915    | 2.303891616 |
| 1476-53-5 - Novobiocin Na           | 338 | 267 | 443.784    | 2.514812639 |
| 97964-56-2 - Lorglumide             | 228 | 230 | 444.4285   | 2.528586942 |
| 797-63-7 - Levonorgestrel           | 251 | 244 | 445.419125 | 2.549758655 |
| 89365-50-4 - Salmeterol             | 330 | 294 | 448.58375  | 2.617393263 |
| 53123-88-9 - Rapamycin              | 228 | 246 | 453.578625 | 2.724144113 |
| 125-69-9 - Dextromethorphan HBr     | 398 | 402 | 460.928875 | 2.881234218 |
| 31431-39-7 - Mebendazol             | 243 | 246 | 486.422    | 3.426075235 |
| 31430-15-6 - Flubendazole           | 242 | 214 | 493.08225  | 3.568418607 |
| 23110-15-8 - Fumagillone            | 315 | 244 | 698.482    | 7.958237768 |

**Supplementary Table 2. Detailed description of the interaction between the ligand the receptor.**

| Ligand     |    | Receptor   |     |     | Interaction | Distance | E (kcal/mol) |
|------------|----|------------|-----|-----|-------------|----------|--------------|
| <b>CL1</b> | 1  | CG1 VAL    | 152 | (B) | H-donor     | 3.38     | -0.5         |
| <b>N1</b>  | 5  | OE1 GLU    | 172 | (B) | H-donor     | 2.7      | -9.5         |
| <b>N1</b>  | 5  | OE2 GLU    | 172 | (B) | H-donor     | 3.16     | -5.3         |
| <b>C3</b>  | 8  | OE2 GLU    | 172 | (B) | H-donor     | 3.12     | -1           |
| <b>C6</b>  | 11 | CD2 LEU    | 105 | (B) | H-donor     | 4.16     | -0.6         |
| <b>C8</b>  | 13 | CG1 VAL    | 84  | (B) | H-donor     | 4.04     | -0.5         |
| <b>C12</b> | 17 | CE2 PHE    | 133 | (B) | H-donor     | 3.65     | -0.5         |
| <b>C18</b> | 23 | CE MET     | 93  | (B) | H-donor     | 3.89     | -0.7         |
| <b>C18</b> | 23 | CD1 LEU    | 95  | (B) | H-donor     | 4.03     | -0.5         |
| <b>C18</b> | 23 | CD2 LEU    | 105 | (B) | H-donor     | 4.01     | -0.5         |
| <b>C19</b> | 24 | CG2 ILE    | 178 | (B) | H-donor     | 3.59     | -0.8         |
| <b>C20</b> | 25 | CD1 LEU    | 95  | (B) | H-donor     | 3.82     | -0.6         |
| <b>C20</b> | 25 | CD2 LEU    | 95  | (B) | H-donor     | 4.27     | -0.5         |
| <b>CL1</b> | 1  | CG1 VAL    | 152 | (B) | H-acceptor  | 3.38     | -0.5         |
| <b>C6</b>  | 11 | CD2 LEU    | 105 | (B) | H-acceptor  | 4.16     | -0.6         |
| <b>C8</b>  | 13 | CG1 VAL    | 84  | (B) | H-acceptor  | 4.04     | -0.5         |
| <b>C12</b> | 17 | CE2 PHE    | 133 | (B) | H-acceptor  | 3.65     | -0.5         |
| <b>C18</b> | 23 | CE MET     | 93  | (B) | H-acceptor  | 3.89     | -0.7         |
| <b>C18</b> | 23 | CD1 LEU    | 95  | (B) | H-acceptor  | 4.03     | -0.5         |
| <b>C18</b> | 23 | CD2 LEU    | 105 | (B) | H-acceptor  | 4.01     | -0.5         |
| <b>C19</b> | 24 | CG2 ILE    | 178 | (B) | H-acceptor  | 3.59     | -0.8         |
| <b>C20</b> | 25 | CD1 LEU    | 95  | (B) | H-acceptor  | 3.82     | -0.6         |
| <b>C20</b> | 25 | CD2 LEU    | 95  | (B) | H-acceptor  | 4.27     | -0.5         |
| <b>N1</b>  | 5  | OE1 GLU    | 172 | (B) | ionic       | 2.7      | -6.8         |
| <b>N1</b>  | 5  | OE2 GLU    | 172 | (B) | ionic       | 3.16     | -3.5         |
| <b>C5</b>  | 10 | 6-ring PHE | 107 | (B) | H-pi        | 4.37     | -0.6         |
| <b>C13</b> | 18 | 5-ring HIS | 154 | (B) | H-pi        | 3.67     | -1           |

**Supplementary Table 3. Docking scores of Haloperidol in complex with Sigma receptor.** Glide and Emodel docking scores obtained for the 18 docking experiments performed on the two crystal structures available for Sigmar1 (5HK1 and 5HK2, in yellow).

| <b>Monomer</b>            | <b>Glide score</b> | <b>Emodel score</b> |
|---------------------------|--------------------|---------------------|
| 5HK1 chain A Halo conf. A | -9.686             | -68.204             |
| 5HK1 chain A Halo conf. B | -9.024             | -67.405             |
| 5HK1 chain A Halo conf. C | -6.506             | -59.422             |
| 5HK1 chain B Halo conf. A | -10.619            | -83.33              |
| 5HK1 chain B Halo conf. B | -8.501             | -62.945             |
| 5HK1 chain B Halo conf. C | -7.062             | -63.042             |
| 5HK1 chain C Halo conf. A | -10.298            | -75.324             |
| 5HK1 chain C Halo conf. B | -8.767             | -65.409             |
| 5HK1 chain C Halo conf. C | -4.832             | -53.866             |
| 5HK2 chain A Halo conf. A | -10.396            | -79.338             |
| 5HK2 chain A Halo conf. B | -8.059             | -39.877             |
| 5HK2 chain A Halo conf. C | -6.701             | -68.392             |
| 5HK2 chain B Halo conf. A | -10.745            | -77.68              |
| 5HK2 chain B Halo conf. B | -8.198             | -62.657             |
| 5HK2 chain B Halo conf. C | -6.356             | -63.02              |
| 5HK2 chain C Halo conf. A | -10.128            | -78.529             |
| 5HK2 chain C Halo conf. B | -9.081             | -67.28              |
| 5HK2 chain C Halo conf. C | -5.471             | -44.825             |

**Supplementary Table 4. Detected binding sites with site score, size and volume.**

| Title       | SiteScore | size | volume  |
|-------------|-----------|------|---------|
| 5HK1_site_1 | 1.258     | 181  | 254.506 |
| 5HK1_site_2 | 1.233     | 160  | 223.293 |
| 5HK1_site_3 | 1.239     | 161  | 242.158 |
| 5HK1_site_4 | 1.168     | 185  | 284.004 |
| 5HK1_site_5 | 1.063     | 107  | 263.081 |
| 5HK2_site_2 | 1.285     | 184  | 245.245 |
| 5HK2_site_3 | 1.265     | 152  | 231.182 |
| 5HK2_site_1 | 1.258     | 191  | 247.646 |
| 5HK2_site_4 | 1.164     | 185  | 300.468 |
| 5HK2_site_5 | 1.016     | 89   | 265.139 |

**Supplementary Table 5. List of primers with sequences.**

| <b>Gene</b>             | <b>Forward sequence</b>     | <b>Reverse sequence</b>     |
|-------------------------|-----------------------------|-----------------------------|
| <i>Chop/ Ddit3</i>      | ACCACACCTGAAAGCAGAAC        | TCTTCCTCTTCGTTTCCTGG        |
| <i>Grp94 / Hsp90b</i>   | AGCACATCTGGGAATCAGAC        | TGCTACTCCACACGTAGATG        |
| <i>Grp78 / Hspa5</i>    | GTTCTTCAATGGCAAGGAGC        | TGAGACTTCTTGGTGGGTAC        |
| <i>p58 IpK / Dnajc3</i> | GTGGAGTAAATGCGGATGTG        | CAATCACTTTGGTGAGGTCTG       |
| <i>Fkbp11</i>           | AGAAACCGAAAGTCCTGTCC        | TTTGGCCGAGTTCTATGACC        |
| <i>Atf4</i>             | ATGGCCGGCTATGGATGAT         | TCATCCAACGTGGTCAAGAG        |
| <i>Atf3</i>             | CGCCATCCAGAATAAACACC        | TATTTCTTTCTCGCCGCCTC        |
| <i>Ccnd1</i>            | AGATGTGCCATCCATGC           | CGGATGGTCTGCTTGTTCC         |
| <i>Hes1</i>             | GCACCTCCGGAACCTGCAGCG       | GCAGCCGAGTGCGCACCTCGG       |
| <i>Hey1</i>             | AAAGACGGAGAGGCATCATCG       | GCAGTGTGAAGCATTTTCAGG       |
| <i>Notch1</i>           | GATGGCCTCAATGGGTACAAG       | TCGTTGTTGTTGATGTCACAGT      |
| <i>Gadph</i>            | CGACTTCAACAGCAACTCCCCTCTTCC | TGGGTGGTCCAGGGTTTCTTACTCCTT |
| <i>Sigmar1</i>          | GACAGTATGCGGGGCTGGACCA      | CCAGTATCGTCCCGAATGGCCATG    |
| <i>Acta2</i>            | GGACGTACAACCTGGTATTGTGC     | TCGGCAGTAGTCACGAAGGA        |
| <i>Drd2</i>             | ATCTCTTGCCCACTGCTCTTTGGA    | ATAGACCAGCAGGGTGACGATGAA    |
| <i>Col1a1</i>           | GCCAAGAAGACATCCCTGAAG       | TCCGGGCAGAAAGCACAGCACT      |
| <i>Fn1</i>              | ATGTGGACCCCTCCTGATAGT       | GCCCAGTGATTTTCAGCAAAGG      |
| <i>Postn</i>            | CACGGCATGGTTATTCCTTC        | TCAGGACACGGTCAATGACAT       |
| <i>Gadd34/ Ppp1r15a</i> | GAGGGACGCCCACTTC            | TTACCAGAGACAGGGGTAGGT       |

**Supplementary Movie 1.** Live imaging of Fluo4 fluorescence in primary adult cardiac fibroblasts treated Haloperidol. Cells were loaded with Fluo4 (green) and imaged by confocal microscopy for 20 seconds. Haloperidol was added at the indicated time in the movie.

**Supplementary Movie 2.** Live imaging of Fluo4 fluorescence in adult human dermal fibroblasts treated Haloperidol. Cells were loaded with Fluo4 (green) and imaged by confocal microscopy for 50 seconds. Haloperidol was added at the indicated time in the movie.
